# Supplementary material for: Canine olfactory detection of a vectored phytobacterial pathogen, Liberibacter asiaticus, and integration with disease control
Source: PubMed Central journal article supplement — Proc Natl Acad Sci U S A. 2020 Feb 3;117(7):3492–501. doi: 10.1073/pnas.1914296117 (PMC7035627; doi:10.1073/pnas.1914296117), 2020-02-03
Supplement: pnas.1914296117.sapp.pdf [file pnas.1914296117.sapp.pdf]

# PNAS

www.pnas.org

## Supplementary Information for

5 Canine olfactory detection of a vectored phyto­bacterial pathogen, *Candidatus*  
Liberibacter asiaticus, and integrated disease control

10 Timothy Gottwald, Gavin Poole, Thomas McCollum, David Hall, John Hartung, Jinhe Bai,  
Weiqi Luo, Drew Posny, Yong-Ping Duan, Earl Taylor, John da Graça, Marylou Polek, Frank  
Louws, William Schneider

Correspondence to: [tim.gottwald@usda.gov](mailto:tim.gottwald@usda.gov)

### 15 **This PDF file includes:**

Materials and Methods  
Figs. S1 to S24  
Tables S1 to S5  
Captions for Movies S1 to S8

### 20 **Other Supplementary Materials for this manuscript include the following:**

25 Movie files S1 to S8  
Thumbnails for movies S1- S8

## Materials and Methods

### A.

30 **Sensitization to disease-related odor and assessment of CLas detection accuracy.** To assess  
sensitivity, specificity, and other latent class statistical metrics of detection accuracy, the 10 trained  
canines ran the 100-tree grid in sequence. The position and number of CLas positive trees within  
grid was then re-randomized, and the 10 canines repeated running the grid in sequence until 9 dogs  
had run 10 replicates of the 100 tree grid for a total of 1000 assessments per canine. A 10<sup>th</sup> canine  
35 ran 5 replicates of 100 trees but was unable to complete all 10 replicates due to illness. Thus, the  
canines assessed  $N = 9,500$  trees as a group. To measure the performance of canines individually  
and as a group, a binary classification test was performed on the data and the following latent-class  
metrics calculated:

|    |                                                                                                            |                          |
|----|------------------------------------------------------------------------------------------------------------|--------------------------|
| 40 | <b>True Positive</b> (TP) correct canine alert on CLas-positive tree                                       |                          |
|    | <b>True Negative</b> (TN) correct rejection, no alert on CLas-negative tree                                |                          |
|    | <b>False Positive</b> (FP) <a href="#">false alert</a> on CLas-negative tree, <a href="#">Type I error</a> |                          |
|    | <b>False Negative</b> (FN) missed CLas-positive target, <a href="#">Type II error</a>                      |                          |
|    | <b>Sensitivity</b> (SEN) or true positive rate,                                                            | $SEN = TP / (TP + FN)$   |
| 45 | <b>Specificity</b> (SPE) or True Negative Rate                                                             | $SPE = TN / (FP + TN)$   |
|    | <b>Precision or Positive Predictive Value</b> (PPV)                                                        | $PPV = TP / (TP + FP)$   |
|    | <b>Negative Predictive Value</b> (NPV)                                                                     | $NPV = TN / (TN + FN)$   |
| 50 | <b>False Positive Rate</b> (FPR)                                                                           | $FPR = FP / (FP + TN)$   |
|    | <b>False Negative Rate</b> (FNR)                                                                           | $FNR = FN / (FN + TP)$   |
| 55 | <b>False Discovery Rate</b> (FDR)                                                                          | $FDR = FP / (TP + FP)$   |
|    | <b>Accuracy</b> (ACC)                                                                                      | $ACC = (TP + TN) / n$    |
| 60 | <b>Probability</b> ( $P$ )                                                                                 | $P = (k!(q-k)!)/q!^{lm}$ |

Where  $n$  = total population assessed,  $q$  = number of positions in the test line or grid,  $k$  =  
number of test samples (ex. CLas positives) in the line or grid,  $l$  = number of canines used in the  
assay,  $m$  = the number of replications, and  $!$  = the factorial of the indicated variable.

65 No single performance metric can capture all aspects of canine detection accuracy. Throughout  
this study we key on three commonly cited metrics; *sensitivity* (SEN), *specificity* (SPE) and  
*accuracy* (ACC). However, we calculate and present a number of performance metrics in order to  
allow the reader to examine and interpret canine detection accuracy from various perspectives.

70 For instance, PPV and NPV are informative metrics; PPV estimates the probability that a positive  
test result actually means the detection of the target scent when present and NPV estimates the  
probability that a negative test result actually means the nondetection of the target scent when not  
present.  $P$  is the probability of correct indication by chance in repeated trials with multiple canines.  
It is useful to note that while PPV and NPV indicate the probability of positive and negative  
75 outcomes from an inspection being, respectively, infected and uninfected, they are dependent on  
the prevalence of disease in the population being tested. In contrast, SEN and SPE are properties  
of the canine diagnostic and independent of disease prevalence.

**B. Canine-handler team performance.** We examined if canine CLas detection accuracy differed  
80 depending upon the handler with whom they were teamed or who was conducting the test replicate.  
The number of errors was exceedingly low across all canine detectors regardless of the canine-  
handler combination. However, there was a non-significant trend across all canines with more  
prevalent FP errors when paired with Handler 2 (Fig. 1 B,C,D).

**C. Improvement of canine detection accuracy by consensus.** Using latent class metrics, we  
85 examined pairing canines to determine if TP detection precision could be improved beyond the  
0.9905 described above by deploying pairs of canines to interrogate the same tree(s) of unknown  
CLas status (Fig. S3). Ex post analysis of the two groups of five canines were paired in all possible  
combinations within each group. Of the 20 combinations examined, detection accuracy improved  
90 for all but one of the pairings in some cases to 100%. Thus depending upon the level of accuracy  
desired, the deployment of multiple canine detectors to interrogate the same trees is beneficial.  
We also determined that detection accuracy increased to 1.0000 when using a consensus of the  
majority 2/3 or 3/3 canines (Fig. S4).

**D. Spatial heterogeneity of CLas detection errors.** False positive alerts can be caused by the  
95 dissemination of the odor plume around an odor source. Jezierski states, *“Ideally, dogs should  
alert as close as possible to the site where the odorous material is hidden by comparing the  
differences in odor concentration inside the odor plume. It is common for a dog to enter, then exit  
and reenter the scent cone during odor detection which may account for number of times a canine  
100 passed a hide as demonstrated in the data. The role of the distribution of the odor plume was  
evident in our experiment when comparing the percentage of false alerts in particular searching  
sites. When searching outdoors the distribution of the odor plume may often enable a more easily  
directional scenting and localization of odor source, which thus takes less time with more correct  
and fewer false alerts”* (52). Craven found that the odor plume of a drug moves and disperses,  
105 depending on air currents, humidity, temperature, or features in the terrain, and may also influence  
the detection performance (53). The fluid dynamics of odorant transport during sniffing has not  
been extensively examined. Angle stated that *“Much more research needs to be conducted in  
order to understand the movement of biological VOC within the thermal plume (e.g., micro  
currents) and in the aerodynamic wake/wind currents in order to develop search patterns to  
110 optimize biomedical detection”* (54).

Thus, it is well demonstrated that canine detectors can pick up a target scent at some distance. In addition to the spatial heterogeneity experiment indicated in the main paper, we conducted a spatial assessment of the detection data to determine if proximity of CLas-positive trees positioned immediately adjacent to, at oblique angles to, or upwind from canine FNs or FPs were related to the cause of the error.

We examined the distance of FP alerts to prior TP locations to determine if FPs are more likely to be found near prior TP locations. However, there was insufficient FP indications within the combined trial data to draw any conclusions on distance or spatial relationships to prior TPs (Fig. S5 A,B). We also investigated for a defined spatial heterogeneity of FP errors near the perimeter of the trial plot. There was no significant spatial dependency of FP errors for distance to the nearest TP, CLas-infected tree, nor to all TP in the proximity. Additionally there was no significant spatial dependency to the perimeter or edge effects (Fig. S6 A-C).

**E. Volatilome and VOC assay.** The biochemical mechanisms underlying the release of disease-related VOC are largely unknown (55-57). To date no published studies define which, if any, VOCs are detectable as an odor by dogs and the identity of the specific VOCs on which dogs alert in relation to infection is speculative (55). Gas chromatography-Mass spectrophotometric (GC-MS) analysis demonstrated a unique composition of multiple VOCs associated with CLas-infected plants versus non-infected plants indicating differential volatilomes serving as nontarget versus target odor sources, respectively. Initially we thought that the CLas infected plant signature does not emanate from the pathogen itself, but rather is due to the bacterial elicited physiological changes in the host that gives off unique changes in volatilome scent signature in response to infection. Contemplating this hypothesis we thought it likely that infected hosts emit increases in some VOCs while depressing others, resulting in unique changes in the complex scent signature of citrus when infected by CLas. We later determined that this is not the case and that canines are actually detecting the CLas pathogen itself (see text). Even so, it is quite possible that the compliment of VOCs in the scent signature is composed of some VOC changes below the detection threshold of GC-MS.

**F. Assessment of CLas infection via qPCR.** The following qPCR primers and protocols (13,41) were used to determine the clinical infection status of CLas-inoculated and/or field trees canine studies. Two to four leaves with petioles were detached from each shoot from two or more major tree branches. DNA was extracted from the midrib/petiole of the sampled leaves. For each tree, a combined sample of 100 to 180 mg of midrib tissue was excised before DNA extraction. After extraction, total nucleic acids in each sample was quantified using a nano-drop spectrophotometer (Nanodrop 2000; Thermo Scientific, USA) and standardized to 50 ng·mL<sup>-1</sup> with nuclease-free sterile water. The quantitative TaqMan PCR method uses 16S rDNA-based primer-probe sets specific to CLAS. The primer/probe system employed was labeled with NED/MGB, i.e., it uses a TaqMan minor groove binding probe, which incorporates a 5' reporter dye and a 3' nonfluorescent quencher. The reporter dye used was NED. This system was optimal for use on the real-time PCR instrument with a FAST platform (Applied Biosystems by ThermoFisher Scientific, Carlsbad, CA). Applied Biosystems Taqman Fast Advanced Master Mix was used with the addition of the primers, probe, nuclease-free water, and polyvinylpyrrolidone

(PVP). The primers were used at a concentration of 0.3 mM, the probe at 0.15 mM, and the PVP (added to bind PCR reaction inhibitors) at 25 mg·mL<sup>-1</sup> mix. Total volume per each of the 96 wells/plate was 20 mL. The cycle parameters of the real-time program were: 95° C for 20 s followed by 40 cycles of 95° C for 3 s and 60° C for 30 s. The instrument software (ABI software; International Trade Systems, Portland, OR) calculates a noise baseline from fluorescent background in the early cycles of the PCR reaction, whereas the signal from target amplification is negligible. A threshold value is then automatically calculated indicating a statistically significant point above the background noise and data for a sample is reported as threshold cycle (Ct) value, which is the number of PCR cycles necessary to reach significant sample signal. Lower Ct values indicate higher initial template in the well, requiring fewer amplification cycles to reach the threshold of significance. For our studies, we considered Ct values of ≤ 36 or ≤ 38.5 which reflect two regulatory Ct thresholds that have been used by USDA, APHIS over time as indicative of as positive qPCR assay for the pathogen.

**G. Assessment of canine subclinical CLas detection.** CLas has a prolonged incubation period of several months to years between infection and HLB symptom expression. Similarly, there is a prolonged subclinical period of weeks to years between infection and detection by qPCR depending on age, size and physiological status of an infected tree. However, it was noted that canines were capable of detecting CLas-positive trees during this subclinical period. A temporal study was designed to assess the point in the subclinical period at which canines can detect CLas-inoculated trees compared with qPCR (current default gold and regulatory standard). A group of 30 trees were inoculated by caging the terminal shoot of each tree and placing 20 presumptive CLas-bacterialiferous psyllids within the cage. Presumptive CLas-bacterialiferous psyllids were taken from a psyllid colony continuously feeding on and presumably acquiring CLas from CLas-positive trees. The inoculated trees were assessed weekly via qPCR and via the canines. For qPCR, 4-6 leaves (depending on the amount of foliage to choose from so as not to oversample and defoliate the trees) and 100-150 mg (wet) 60-100 mg (dry) root tissue/tree as described above. The experiment was completely blind during sampling because it was not possible to determine the infection status of the trees until the infections increased in bacterial populations beyond the minimal threshold for qPCR and eventually became qPCR-positive, i.e., clinically positive, often several months after the bi-weekly canine interrogation.

For this trial, 10 canines assessed a randomized mixed population of 90 non-infected and 10 presumptive CLas-positive trees in a 10 X 10 tree array bi-weekly for the first 25 weeks at which point agreement of CLas infection status was stable among the 10 canines. The assays were replicated 3 times during each assay date. Data were later combined across replications. All 30 trees were successfully detected by one or more canines in combination within the first month. However, qPCR status continued to be assayed monthly. Over the 32-mo. course of the study, 16 and 20 of the initial 30 trees inoculated via psyllids were confirmed by qPCR as CLas-positive at Ct ≤ 36 and 38.5, respectively, over the duration of the experiment. Additionally, to reach these optimums of CLas-positive detection required 16 and 17 months post inoculation at qPCR thresholds of Ct ≤ 36 and 38.5, respectively. Once canine detection reached an optimum at 7

months canine assays were discontinued but resumed at 30 and 32 months to demonstrate that canines as a group maintained at >90% detection over time (Figs. 3, S7, S8).

200

Because only a few leaves or a small amount of root tissue could be destructively sampled each assessment date, and because CLas infection is erratically distributed in trees, trees were not consistently qPCR clinically positive over time. The number of canines correctly identifying each CLas-positive tree (testing qPCR positive on one or more assessment dates) were graphed over time along with their qPCR status. The time between inoculation and canine detection ( $\Delta T_{canine}$ ) and the time between infection and qPCR confirmation ( $\Delta T_{PCR}$ ), were calculated for each of the trees that was eventually confirmed to be CLas-positive.

205

**H. Assessment of CLas-infection from citrus root tissue.** Approximately 3g of feeder root tissue was collected from CLas-infected trees (confirmed via qPCR) and from containment greenhouse CLas-free trees as a negative control. All samples were washed free of visible soil residue, maintained turgid by wrapping in moistened paper towels, and used within 2 days of harvest. Nine trained canines each interrogated a 5X5 array consisting of metal cans into which the test root tissue was placed. Two of the 25 cans were randomly selected to hold CLas-positive root tissue and the remainder non-infected root tissue. The cans were randomized after each of 5 replications and the test repeated once. Metal cans were used to ensure that the VOCs were contained and did not permeate the soil on which they were placed. Performance was measured by the same metrics as for the assessment of CLas detection accuracy described above.

210

215

**I. Assessment of discrimination of CLas from other citrus pathogens.** Four trained canines were transported to the USDA, Agricultural Research Service, Molecular Plant Pathology Laboratory and Exotic Pathogens of Citrus Collection (EPCC) in Beltsville, MD. The laboratory maintains an international *in vivo* collection of several hundred accessions of citrus pathogens from around the world. To test canine discrimination for CLas-infected trees versus trees infected with other pathogenic organisms, a 20-tree grid (2 rows of 10 trees ~3 m apart within and across row) of mixed non-infected and potential target (trees infected with various citrus pathogens) potted trees was arranged on the lawn outside of the greenhouse under USDA, Animal and Plant Health Inspection Service (APHIS) regulatory approval and oversight over a 3-day period. Each replicated grid consisted of multiple non-infected citrus trees with randomly dispersed trees with CLas (positive control), CLaf (*Candidatus Liberibacter africanus*), various bacterial, viral, viroid, phytoplasma and spiroplasma diseases (Table 1). In addition, one tree from Brazil was assessed by the canines that was presumptively infected with CLam (*Candidatus Liberibacter americanus*) but repeated qPCR of this tree for this pathogen have remained inconclusive. All four canines were presented with each non-target pathogen-infected tree at least twice in different grids to determine if specific training for CLas would result in false positive alerts on trees infected by non-target pathogens with symptoms and/or physiological manifestations similar to HLB decline. In this study canines were exposed to citrus pathogens infecting a range of scion cultivars, rootstocks, and citrus species.

220

225

230

235

240 A portion of the overall pathogen collection assessed by 4 canines is provided as an example. Over  
the 3-day study, 1944 trees were assessed by canines as shown in the latent class metric table.  
Relative to Table S2, the individual error calculations and latent class metrics for detection are  
shown in Figure S10.

245 **J. Cross reaction studies of citrus infected with other *Liberibacter* sp.** CLas infected trees in  
the collection originated from various countries including USA (Florida and California), Taiwan,  
Thailand, Vietnam, Reunion, Japan, Pakistan, and India, thus representing a diversity of CLas  
strains. For *Candidatus Liberibacter solanacearum*, 3 canines were interrogated 10 potted tomato  
250 plants in a row in which a single plant infected with *C. Liberibacter solanacearum* was randomly  
placed. The experiment was repeated once with a second *C. Liberibacter solanacearum* -infected  
tomato plant randomly placed. Neither canine reacted to either of the *C. Liberibacter solanacearum*  
–infected plants or any non-infected plants (0 FN) indicating that there was no cross reaction of  
canines trained on CLas with the *C. Liberibacter solanacearum* pathogen.

255 For *Liberibacter crescens*, budwood purportedly infected with the bacteria was obtained from the  
California Department of Food and Agriculture (CDFA) who had previously reported *L. crescens*  
infected material from California (44) and transported under regulator permit to the USDA,  
Agricultural Research Service, Molecular Plant Pathology Laboratory in Beltsville, MD, where it  
was budded into non-infected sweet orange scions. Subsequently the presumptively *L. crescens*-  
260 infected trees were transported under regulatory permit to the USDA ARS Horticultural Research  
Lab in Fort Pierce, Florida for canine interrogation. Multiple post-graft transmission PCR assays  
conducted in Beltsville and in Fort Pierce were all negative for *L. crescens*, however, due to the  
prolonged subclinical nature of *Liberibacter sp.*, they were considered potentially *L. crescens*-  
infected. Eight and six HLB detector canines were used in two replicates of the experiment. In  
265 each replicate, 50 non-infected citrus were arrayed in 5 rows of 10 plants. One plant was randomly  
replaced with a known CLas-positive control and two were replaced with *L. crescens*-graft-  
inoculated trees. Each canine interrogated the grid four times during, with the infected/inoculated  
trees randomly rearranged each time. All canines correctly identified the CLas-infected trees  
(1.0000 accuracy) with no alerts on the presumptive *L. crescens*-inoculated plants with no FP or  
270 FN alerts.

**K. Composition of the CLas-infected tree volatilome.** Headspace sampling and gas  
chromatography-mass spectrometry (GC-MS) analysis was used to assess non-infected and CLas-  
infected tree volatilomes. Three mature leaves from non-infected and CLas-infected grapefruit  
275 seedlings (confirmed by qPCR) were removed and immediately used for volatile analysis. Each  
leaf was rolled and sealed in a 20-mL vial (7 cm in height) crimp capped with a silicone septum  
(Gerstel Inc., Linthicum, MD). After incubation for 30 min at 22° C, a 2-cm solid phase  
microextraction (SPME) fiber (50/30 µm DVB/Carboxen/PDMS; Supelco, Bellefonte, PA) was  
exposed to the headspace for 30 min. After exposure, the SPME fiber was inserted into the injector  
280 of a GC-MS (Model 6890; Agilent, Santa Clara, CA) to desorb the extract for 15 min at 250° C.  
The GC-MS equipment and settings were: DB-5 (60 m length, 0.25 mm i.d., 1.00 µm film  
thickness; J&W Scientific, Folsom, CA) columns, coupled with a MS detector (5973 N; Agilent).

The column oven was programmed to increase at 4° C·min<sup>-1</sup> from the initial 40° C to 230° C, then ramped at 100° C·min<sup>-1</sup> to 260° C and held for 11.7 min for a total run time of 60 min. Helium was used as carrier gas at a flow rate of 1.5 mL·min<sup>-1</sup>. Inlet, ionizing source and transfer line were kept at 250°, 230°, and 280° C, respectively. Mass units were monitored from 30 to 250 m/z and ionized at 70 eV. Data were collected using a data system (ChemStation G1701 AA; Hewlett-Packard, Palo Alto, CA). A mixture of C-5 to C-18 n-alkanes was run at the beginning of each day to calculate retention indices (RIs) (59). Volatile compounds were identified and quantified by comparison of their mass spectra with authentic volatile compound standards, and/or library entries (NIST/EPA/NIH Mass Spectral Library, version 2.0d; National Institute of Standards and Technology, Gaithersburg, MD), as well as by comparing RIs with published RIs (61-66) (Fig. S11, Table S3). As stated by Angle, “*Much more research needs to be conducted to understand the movement of biological VOC within the thermal plume (e.g., micro currents) and in the aerodynamic wake/wind currents in order to develop search patterns to optimize biomedical detection*” (54).

**L. Canine detection of CLas in non-citrus host plants.** For each non-citrus host (*Catharanthus roseus* (L.) G.Don – rosaceae and Madagascar periwinkle, *Nicotiana benthamiana* Domin – solanaceae, were interrogated by 4 canines. For *C. roseus* rows of 10 plants per row were interrogated by four canines with one CLas-positive *C. roseus* placed randomly in the row of non-infected *C. roseus* plants. The experiment was repeated 10X per canine using different CLas-infected plants in different random positions (Fig. S12A). For *N. benthamiana* only a few plants were available. Therefore, a line of 10 stations was used composed of 8 potted citrus trees with a single CLas-infected citrus in one position as a positive control and one CLas-infected *N. benthamiana* randomly placed in the line. Six canines interrogated 10 re-randomized lines (Fig. S10B).

**M. Canine detection of CLas in bacterialiferous *Diaphorina citri* psyllid vectors.** Psyllids from CLas-infected and non-infected populations were harvested from established colonies feeding on CLas-positive and non-infected potted citrus trees, respectively. Small tubular insect cages (10 cm long by 3 cm diameter) were used to contain 20 CLas+ or CLas-ACP each. One cage was placed in each of 10 open-top metal cans such that only a single randomly placed can contained 20 caged CLas-positive ACP. Three canines each interrogated the 10 cans, then the position of the CLas-positive cage was rerandomized and the canines reinterrogated all cans for a total of 9 replications per canine (Fig. S13).

**N. Canine interrogation of axenic CLas bacterial culture.** The presumptive coculture of CLas was established by coauthor (Y.P. Duan) from *D. citri* gut microflora and contained multiple uncharacterized bacteria. The coculture was assayed via qPCR on the day of the canine assessment and found to have a Ct = 25.32 (estimated 6.79 X 10<sup>5</sup> copies/ml). The 200ul of the coculture as well as 10<sup>-4</sup> (Ct=37.93) and 10<sup>-6</sup> (Ct = non detectable) dilutions were pipetted onto sterile cotton filter paper discs and placed in individual metal cans. Controls were created by pipetting 200ul of sterile water on identical cotton discs. Pure cultures of *E. coli*, *Pseudomonas* sp., and an uncharacterized bacterial isolate were also prepared and 200ul pipetted onto cotton



filter discs at full strength as additional negative controls. Ten metal cans were arrayed in a line with random placement of one can with the CLas co-culture (at various dilutions), one or more cans with other pure bacterial cultures and the remainder with sterile water controls. Canines were allowed to run down each line interrogating all 10 cans in sequence. The entire experiment was repeated twice for 3 replications using 2 canines per replication over 2 days.

At full concentration all canines correctly alerted on the CLas co-culture with 1 FN and 0 FP alerts out of 120 targets assayed sensitivity = 0.9167, specificity = 1.0000 and accuracy = 0.9917 (Fig. S14A). Canines were also tested at 2 dilutions of the co-culture,  $10^{-4}$  and  $10^{-6}$ . At a dilution of  $10^{-4}$ , CLas concentration was near the qPCR detection threshold and canines had 1 FN and 1 FP alerts out of 120 targets assayed, sensitivity = 0.8333, specificity = 0.9907 and accuracy = 0.9750 (Fig. S12B). At the lowest concentration tested, a dilution of  $10^{-6}$ , concentrations of CLas were below qPCR detection threshold and yet canines still alerted on some of the targets; 5 FN and 2 FP alerts out of 120 targets assayed, sensitivity = 0.04167, specificity = 0.9907 and accuracy = 0.9333 (Fig. S14C). This lowest concentration contained less than a single copy of the CLas bacterium, indicating that the canines may be alerting on bacteria subcomponents (ex. proteins, peptides, metabolites, etc.) with more than one copy per bacterial cell. The probability ( $P$ ) of correct indication of the co-culture by chance in repeated trials with multiple canines was  $1 \times 10^{-12}$ ,  $1 \times 10^{-12}$ , and  $1 \times 10^{-24}$  for the full concentration,  $10^{-4}$  and  $10^{-6}$  dilutions, respectively.

**O. Field validation and deployment for early detection in an emerging HLB epidemic.** *Commercial citrus.* Canine CLas detection proficiency was assessed in commercial citrus orchards St. Lucie County, Florida. CLas and its vector ACP are endemic and widespread in Florida, and the majority of plantings exceeding 90% infection incidence. Therefore, to find plantings with low incidence, only newly established orchards less than 18 months old were used. A complete census of CLas infection was conducted in a ~4 ha block of 12-mo-old red grapefruit by collecting four leaves from each tree, assessing CLas infection via qPCR, and preparing a map of resulting estimated disease incidence. Each canine systematically assessed all trees in the study block to determine their sensitivity, specificity and other metrics as indicated above in a commercial citrus setting. As indicated above, canines are capable of detecting CLas infection weeks to months prior to our ability to confirm infection via qPCR. Canines frequently alerted on trees that were recorded as qPCR negative for CLas. Therefore the block was periodically reassessed via qPCR to allow us to determine if the canine alerts were true positives but subclinical to qPCR at the time of canine interrogation, or if the alerts were false positives. Thus in Florida the determination of canine detection accuracy was often offset by several months following the day on which the canines assessed the citrus orchard.

To more accurately examine canine detection of initial infections, i.e. early pathogen detection, 4, and 9 canines were transported to the commercial citrus growing area in the Rio Grande Valley of South Texas over two different trips, respectively, in 2016-2018. At that time in South Texas, CLas infection was widespread but early in the epidemic and thus remained in low incidence. The canines examined multiple commercial red grapefruit orchard blocks, and one experimental block

of red grapefruit located at the field site of Texas A&M University, Kingsville Citrus Center near Weslaco, Texas with 3785 trees assayed (Fig. S15).

370

Prior to and 1 mo. after canine assessment, the citrus blocks were assessed by qPCR to determine the spatial distribution of CLas-infected trees. Canines individually ran the qPCR-assessed rows interrogating all trees. Canines detected the previously confirmed CLas-infected trees (sensitivity = 0.7112, specificity = 0.9719 and accuracy = 0.9559), but multiple canines alerted on additional presumptive CLas-infected trees in the blocks as well. These presumptive CLas-infected trees were considered false positives for the purpose of calculating the latent class statistics. However, the majority of these were undoubtedly cryptic infections below the detection threshold of PCR to confirm CLas infection. Had we been able to retest these trees through time, it is highly probable that many would have been confirmed as CLas-positive, increasing the metrics for sensitivity, specificity, and accuracy of the assay considerably and more in line with prior tests where the disease status was known with certainty.

375

380

**P. Residential citrus.** The canines were trained for residential citrus survey in various urban locations in the Rio Grande Valley area of Texas. Although no PCR data were available to confirm canine detection accuracy in the majority of the residential areas where the canines trained, the location of a small number of confirmed CLas positive trees were known and utilized for training. Canines were also deployed to Los Angeles and Orange Counties of Southern California for residential detection validation studies in December 2018 and February 2019. Two or three canine and handler teams were deployed on each validation trip and canine teams worked closely with California Department of Food and Agriculture (CDFA) inspectors to gain official and sanctioned access to individual properties. Residential properties are very diverse environments with a broad range of plant species, age, size, and horticultural health, interspersed within a limitless variety of obstacles and other animals often encountered. Citrus trees in this environment may be planted directly in the soil or in pots and may be difficult to reach, requiring the canines to wind, squeeze and/or climb throughout a sometimes dangerous environment.

385

390

395

Over the two validation deployments, the canines examined 52 residential properties in CLas infected areas of Orange and Los Angeles Cos. CDFA had prescreened these properties and pre-assayed any presumptive citrus trees in the landscape via PCR. In addition, CDFA had obtained potted citrus trees of known CLas infection status (CLas-positive and CLas-negative) from the USDA, Agricultural Research Service Citrus Germplasm Repository in Riverside, California and placed them throughout the landscapes of the residential properties. These trees were unmarked and served as blinded true positive and true negative unknowns to the canine detection teams. For the two deployments, there were 19 and 14 blinded trees, respectively distributed within the residential properties. The blinded trees were destroyed immediately after the study to ensure no unintentional spread of CLas occurred within the residential environment. Canines performed well identifying the previously confirmed (PCR-positive) CLas-infected trees within the residential landscape and the blinded potted trees, sensitivity = 0.9024, specificity = 0.9394, accuracy = 0.9189 (Fig. S16). It was recognized that many CLas-infected trees likely resided within these residential properties that were below the qPCR detection threshold. These suspect canine

400

405

410

detections were not incorporated into the latent class analyses because the true CLas infection status was unconfirmed. There were many canine alerts on such trees, and their precise positions within the landscape of each property were recorded. In addition, CDFA immediately collected tissue from these trees and ran subsequent qPCR assays on them. Four additional CLas-infected trees on which the canines alerted were subsequently confirmed. CDFA will continue to re-assay the remaining suspect trees on which the canines alerted over time. It is highly probable that more of these trees will be confirmed through time as CLas-positive, rising the true sensitivity and accuracy of the assay to be more in line with prior canine performance in situations of known CLas incidence. This validation study demonstrates the keen canine early detection ability and underscores the utility of canine CLas detectors in diverse environments.

**Q. Deployment strategies for detection of CLas in commercial orchards** To ensure that canine detection is optimized, we normally run each canine along each row of trees, turning at the end of the row and entering the next, using a serpentine pattern to traverse all rows in sequence. This can be done with dogs on a leash controlled by the handler or off leash for more experienced canines familiar with the search pattern. The canines interrogate, (smell), each tree in sequence. When deployed in commercial citrus plantations, trees spacing within row are 2-4m depending upon species, density of planning, etc. As trees mature, they form long foliar hedgerows. Canine detectors are nearly instantaneous at scent recognition and alert on CLas-infected trees within 2-3 seconds. Although detection speed may be considered a less important metric of performance compared with accuracy, it should not be underestimated (41). Based on our experience using canines in commercial citrus orchards, canines interrogate at a rate of 2.26 +/-0.91 s per tree while trotting along rows. When they alert on a tree by sitting, the average reward time is 47.45 +/-16.37 sec, after which the canine is ready to resume the search. We use these values to extrapolate the time required to survey a standard 4.05 ha (10 acre) block of mature citrus consisting of 1470 trees (Table S4). Disease incidence affects reward time. The more diseased trees encountered, the more canine alerts occur, and the more reward time required. Thus as disease incidence increases from 0.5 to 5.0%, the time require to survey the entire block increases from 60.91 to 113.89 minutes, respectively. However, compared with the time to sample and process samples for molecular assay (ex PCR), serological assays, or even human visual assessment of individual trees, canines are very rapid.

**R. Canine duty cycle.** The durability of individual canines and the environmental conditions of the search area effect their duty cycle. Heat and humidity causes canines to pant which can divert some of the scent intake away from the nasal passages when odor is discriminated. Within the canine detection community, the most frequently stated duty cycle is 30 minutes followed by a rest period of similar duration (62). Interestingly, Gardner *et al.* demonstrated that within the context of their study, environmental and physiological variables were not strongly related to duty cycle measures. Two of four detector canines showed a statistically significant negative relationship between percent alerts and environmental temperature, and one canine showed a statistically significant positive relationship between percent alerts and body temperature. Gardner also found no statistically significant correlation between performance and relative humidity. In the Gardner study, all four canines were willing and able to work as long as asked and the

conditions of the study did not exceed the capabilities of the canines to work for extended periods. This demonstrated that within practical limits, dogs can work for extended periods of time if they are trained to do so. However, citrus is grown most often in warm to tropical climates. Therefore, we adopted a 30 min working, 30 min resting duty cycle to maintain optimal detection performance. Thus, every ~30 min., one team ends their survey cycle and another resumes the survey where the first team stopped. The first team rests for 30-60 minutes before resuming survey duties, etc. In practice, multiple teams are deployed in an area simultaneously to optimize survey time.

Occasionally there are adverse environmental variables with which canine teams must contend. Although canines are seemingly immune to rough brush, high grasses, or obstacles common in residential areas, handlers are often not so immune or require more time to avoid obstacles. Additionally, we found that some common orchard weeds (ex. *Tribulus terrestris*, i.e. goatheads) have spines that can puncture the canine's footpads, requiring canines to wear fitted boots with durable rubber soles in some situations. The canines immediately adapted to and ignored the boots after a few minutes.

**S. Simulations of deployment strategies.** The spatial heterogeneity of HLB infections is related to ACP vector dispersal dynamics. Immigrating ACP populations preferentially accumulate at the periphery of citrus blocks and along orchard voids such as roads, canals, ponds, and staging areas devoid of trees, which coincide with initial CLas transmission and subsequent infections (11,48,63-67). Anco determined there was a slightly higher ACP population abundance along southern and eastern orchard edges compared to northern and western edges that significantly corresponded to the phototactic response of psyllids to the seasonal azimuth/elevation of the sun (48). We can take advantage of this spatial heterogeneity for early detection of CLas infections when deploying canines.

We developed a series of deployment strategies that a canine detection company can provide to citrus producers and have calculated their relative detection efficacy. These are based on the known spatial distribution of HLB, which initially accumulates at the periphery of the block, i.e., edge effect, and simulations to calculate the probability of detection. Depending upon the need of the citrus grower (+/- presence of the pathogen versus determination of exact disease incidence), canines could be deployed in several different ways, ranging from a simple perimeter survey to a stratified complete census of all trees. Perimeter surveys are the quickest, and therefore the most economical. For example, for a single-tree depth perimeter survey versus a deep perimeter survey of the outermost 3 trees, the probability of detection is 0.7720 versus 0.9200. For a stratified survey of every 7th, every 3rd, versus every row the probability of detection increases from 0.7900, to 0.8740, to 1.0000, respectively (Fig. S17).

**T. Assessment of canine deployment survey strategy.** Prior spatial analyses demonstrated that CLas infections are spatially heterogeneous in commercial citrus orchards related to ACP vector dispersal dynamics (64-67). Immigrating ACP populations preferentially accumulate at the periphery of citrus blocks resulting in edge-associated patterns of CLas transmission and

subsequent infections. Therefore, for early detection of CLAs infections in commercial orchards, we can exploit the use of peripheral surveys of entire plantations and individual internal blocks, preferentially, to take advantage of the significantly higher accumulation of infections on the periphery of orchard blocks. However, if the intent of the survey is to estimate the overall incidence of CLAs infection, various stratified survey designs for canine olfactory detection can be employed. The more intensive the spatial stratification, the higher the probability of detection (Fig. S17). Finally, if the intent is to determine the incidence and precise location of CLAs infection with the greatest accuracy possible for management decision making, a complete census survey is required (Fig. S17).

We investigated the validity and efficacy of different possible survey patterns for canine deployment using 2 years of temporal CLAs infection data from a large south Florida citrus plantation. The data represent four surveys (each a complete visual census) for more than 250,000 citrus trees in 180 blocks (Fig. S18). The blocks are arranged in six rows of 30 blocks, and each block typically contains around ~1500 trees of the same age and variety. Symptomatic trees were identified through visual inspection by experienced surveyors, and their inspection accuracy was in good agreement with PCR confirmation. It is worthy to note that visual inspection may not detect exposed, latent or cryptic CLAs-infected trees.

To optimize sampling effort, canines are deployed initially to survey a sub-sample of trees within the citrus block, either via perimeter or stratified survey. If any CLAs-infected trees are detected in the pre-screen survey, a subsequent complete census survey is conducted for the CLAs-positive block. Therefore, we will only select CLAs-positive blocks with 0-5% DI for analysis of survey performance. Data of the spatial distribution of CLAs was used from a previous study (38). Totally, we have 451 citrus blocks selected from the plantation across the four survey time points (Fig. S18 A,B,C). Citrus orchards are planted in rows and as trees mature branches interlock and form large hedgerows. Thus, the canine and human handler teams are constrained along the rows and cannot easily cross between rows except at the block periphery. We take this into account by developing either perimeter or stratified S shape serpentine survey patterns (Fig. S17, S18 C,D). We varied the sampling density for both canine survey strategies to compare their CLAs detection performance (e.g. perimeter surveys of 1, 2, 3...7 tree depth and compared with stratified surveys via serpentine patterns of each 2<sup>nd</sup> row, 3<sup>rd</sup> row...7<sup>th</sup> row). For each selected citrus block, we calculated the number of CLAs-infected trees encounters under the proposed survey pattern.

Binomial distribution theory and simulation were used to determine the detection accuracy of the perimeter and various stratified designs deployment strategies in Figures S15 and S16. Note when we use a perimeter survey of 7 trees deep and stratified survey of every row both surveys provide a complete census surveys. For each 4 ha block, each of the four corners was used as a possible starting position for canine deployment. The efficacy of detection via these survey strategies was estimated considering a range of canine detection accuracy,  $1-(FN+FP)$ , of 0.05 to 1.0, where 1.0 = 100% accuracy with no errors and 0.05 = 5% accuracy (Table S5). Results demonstrated that if we consider vector-biased spatial distribution of CLAs infection in commercial orchards and assume 95% canine detection accuracy, perimeter survey was superior to stratified survey for

540 confirmation of CLAs-infected tree presence and ranged from 76.6 to 99.5 percent reliability of  
detection when disease incidence is <2% for perimeters 1-7 trees deep (Table S5). For the lowest  
intensity canine surveys, 1 tree deep perimeter versus every 7<sup>th</sup>-row stratified survey, in 2.4 ha (10  
ac) orchard block canines would pass by and interrogate ~232 versus ~312 trees or 16 versus 21%  
545 of the planting, for perimeter versus stratified survey, respectively. This equates to 24% less trees  
interrogated with a commensurate savings in deployment time.

**U. Simulation of spatiotemporal dynamics of CLAs-infection to compare the efficacy of CLAs control using visual inspection, PCR, and canine detection.** Mathematical modeling and  
geospatial technologies are able to grasp the spatiotemporal complexity of pest and disease  
550 invasion dynamics as well as the implementation and evaluation of management programs. Based  
on previous modeling frameworks and analyses (68-71), we use a spatially explicit, stochastic,  
individual-based compartmental (SEIR) model to simulate CLAs spread across a commercial  
citrus landscape. Citrus hosts are classified by disease status: Susceptible, Exposed, Cryptic  
(infectious, but asymptomatic), Infected (infectious and symptomatic), and Removed, whereas, the  
555 ACP vector is modeled as a relative density  $\rho(t)$  at the orchard-level to incorporate general  
population dynamics (e.g., endemic or seasonal/cyclic populations) affecting transmission risk.  
Thus, the instantaneous rate of exposure for a susceptible host  $i$  at time  $t$  is given by

$$\varphi_i(t) = \rho(t) \left[ \varepsilon + \beta \sum_j K(d_{ij}, \alpha) \right]$$

560 where the summation runs over all infectious hosts  $j$ . The parameters  $\varepsilon$  and  $\beta$  represent the primary  
(external) and secondary rates of infection. The function  $K(d_{ij}, \alpha)$  defines an isotropic dispersal  
kernel where  $d_{ij}$  is the distance from susceptible host  $i$  to infectious host  $j$ , and  $\alpha$  is a scaling  
parameter. For the CLAs infection simulation study, an exponential dispersal kernel was used. We  
565 use a host orchard landscape of 5,616 trees in a 6-block formation representing a commercial citrus  
grove with an initial, low incidence of CLAs-infected trees (selected randomly or introduced along  
the borders, i.e. edge effect of vector transmission), and an endemic ACP population for the  
simulation analysis. Simulation design and parameterization determined by input from citrus  
growers/production managers, diagnostic laboratories, and survey managers are shown in Fig. S19.

570 Survey and removal are the sole controls implemented in this simulation study to investigate the  
efficiency of CLAs detection techniques. Survey deployment options include survey design (e.g.,  
full census, perimeter/edge, stratified), timing/frequency, and detection technique. The temporal  
probability/efficiency of CLAs detection for canines and PCR was determined via data analyzed  
575 from the canine early detection study discussed above. Canines detected CLAs-infection in 70% of  
the host plants in the first month and all plants at six months after infectious ACP exposure. PCR  
detected maximally 54% host plants infected with CLAs at 5 and 10 months post-exposure;  
however, PCR confirmed on average just 20% at any given time point (Fig. 3). This pattern of  
CLAs detection via PCR is indicative of the sampling issue (i.e., selecting the right tissue for assay)  
580 when the disease is not yet systemic in the host plant.

Curves were fitted to the data with variable ranges to present best- and worst-case scenarios on detection probability for each technique (Fig. S20A). Additionally, we consider visual survey as a third detection technique. Bassanezi modeled the relationship between tree age and symptom development that we use to constrain visual detection probability as well as augment PCR sampling efficiency (and thereby increasing detection probability over time as the infection progresses within a host) (72) (Fig. S20B):

$$s(t) = \frac{1}{\left(1 + \left(\frac{1}{s_0} - 1\right) e^{-rt}\right)}$$

After disease confirmation, removal of infected trees is the primary combatant in reducing the local inoculum pressure. Removal strategy options include removal of individually confirmed CLas-positive trees and culling around detections. It is important to note that both infection confirmation (i.e., lab capacity for sample processing) and removal often occur after variable time delays; to account for this variability, lab confirmation and removal times can be sampled from normal distributions with a specified mean and standard deviation, and restricted by a maximum delay for mandatory removal (e.g. within 30 days). Additional scenarios were investigated to analyze the impact of delayed removal protocols on orchard sustainability when paired with canine deployment (Figs. S21, S22, S23). Tree replacement of removed hosts can be incorporated to investigate replanting scenarios for replacing lost citrus production. Replanting options include timing and frequency as well as criteria to stop a replanting program (e.g. maximum resets allowed per landscape or per host). For the simulation studies when replanting was implemented, we assumed tree replacement occurred annually during the first quarter of the year for any hosts removed in the previous year due to CLas infection (Fig. S24).

Costs were integrated into the model to analyze the sustainability of each simulated detection program. Survey, removal and replanting cost ranges were determined via consultations with commercial survey companies and citrus industry experts. Detector canine costs can vary by the number of canine-handler teams deployed and survey design. PCR costs include sample collection, lab processing, technician salaries, infrastructure costs, etc. Visual assessment or scouting can vary by acreage, frequency and multi-pest survey design. Removal and replanting costs were defined on a per tree basis. Additionally, noting the host variety/cultivar, planting density and age, the production outputs and costs were estimated from compiled data from growers and regulatory agencies. Yield is also impacted by CLas infection. To estimate the relative yield, Bassanezi established a general relationship between symptom severity and relative yield of an HLB-infected tree in Brazil (50).

$$y = e^{-1.85x}$$

To conduct comparative economic analyses of detection technologies, we implement a full survey of the host landscape every 180 days. Additionally, we reduce the canine detection probability

toward a worst-case scenario and shift PCR detection probability toward a best-case scenario (Fig. 4). A side-by-side comparison of each detection program scenario conducting a full survey twice per year with the same initial conditions (10 Exposed hosts located on the edges) and individual infected tree removal within 30 days of detection were simulated (Fig. 4, Movie 7). We also examined different initial conditions (edge versus random distribution of initial CLas-infected trees) and removal protocols for each detection program (Figs. S21, S22). As the delay in mandatory removal post detection increased, canine deployment is less impactful on orchard sustainability (although dramatically better than PCR or visual) as the detected inoculum sources are allowed to continue propagation before being removed. Mandatory removal within 90 and 120 days of detection resulted in ~48% and ~36% healthy trees remaining in the orchard, respectively, when canines were deployed. On the other hand, swift removal within 30 days post detection resulted in more than 90% healthy hosts (Figs S21, S22).

635

630

635 Simulations were subsequently run 10,000 times to estimate the proportion of disease-free (Susceptible) hosts, total trees removed annually, and the 95% confidence intervals for the operating profit per acre over the course of the epidemic given 10 initial edge introductions and removal within 30 days of detection via each technique (Fig. S23, Movie S8) and given 10 random infections with canine deployment and different removal deadlines (Fig. S22). We also explored a similar simulation of the three CLas detection methods (canine, PCR and visual), with and without annual replacement of infected trees that accumulated over each prior year (Figs. S23,S24, respectively).

640



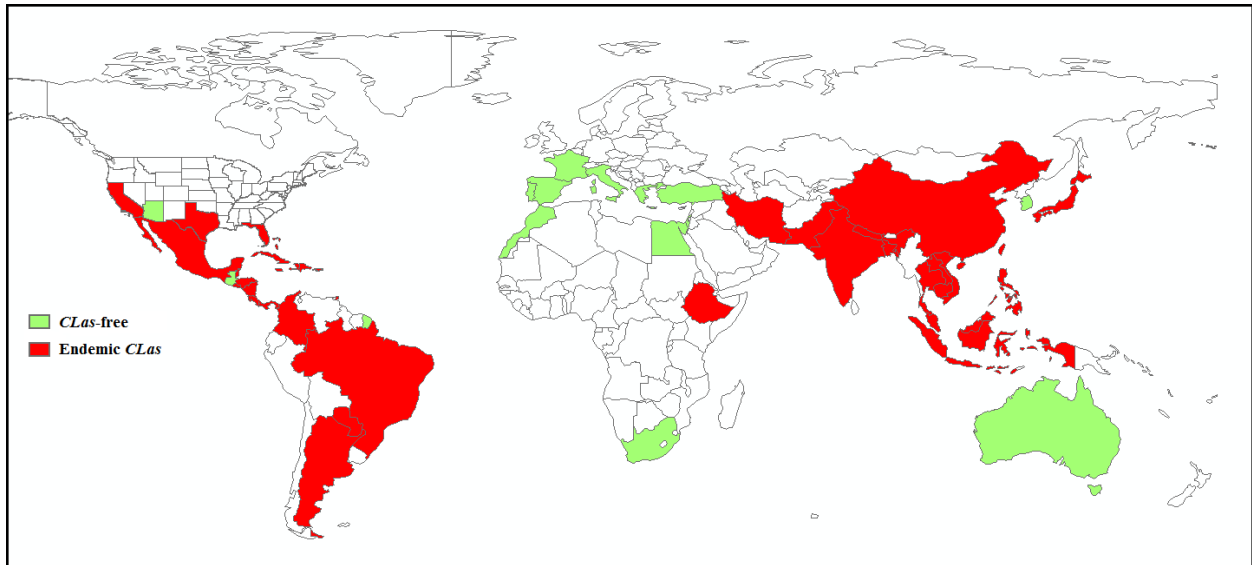

645 **Fig. S1. Citrus producing counties and presumptive distribution of CLas - causal agent of citrus Huanglongbing (HLB).**

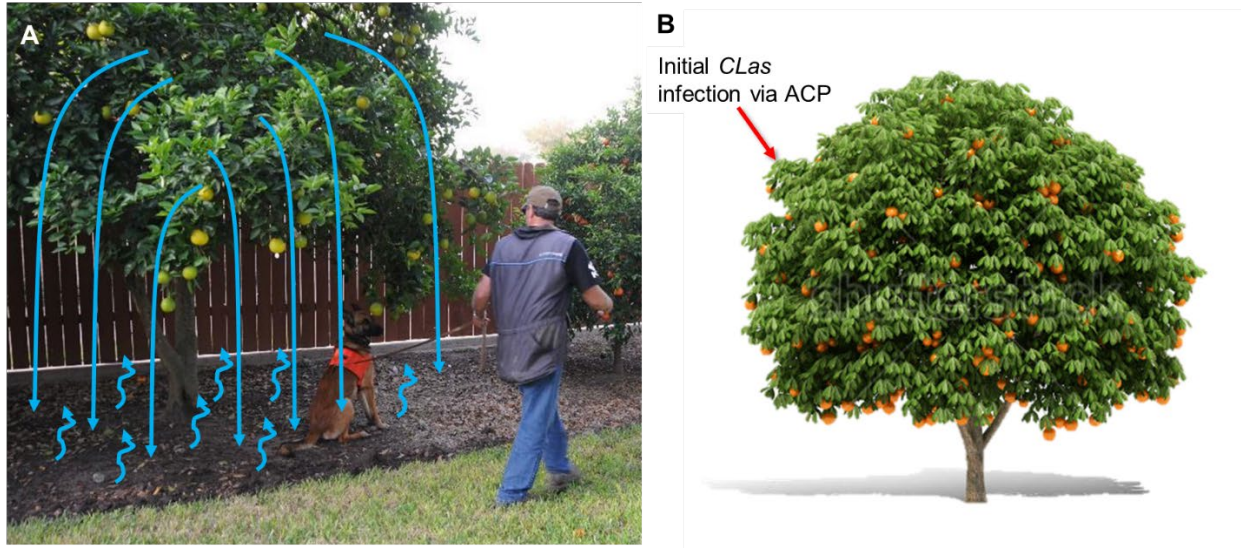

**Fig. S2. Holistic interrogation of CLAs-infected trees by canine detectors.** A. Early detection via canines is devoid of sampling issues. The volatile scent signature associated with CLAs-infection settles from the canopy and simultaneously emanates from root infections pooling at the base of the tree. The canine detector interrogates the tree holistically by alerting on the scent signature regardless of its origin, i.e., a single leaf, root, stem or the entire tree if systemically infected. B. Conversely, other detection technologies, eg. PCR, are reliant on selecting and assaying a small amount of tissue from large trees and often miss incipient infections.

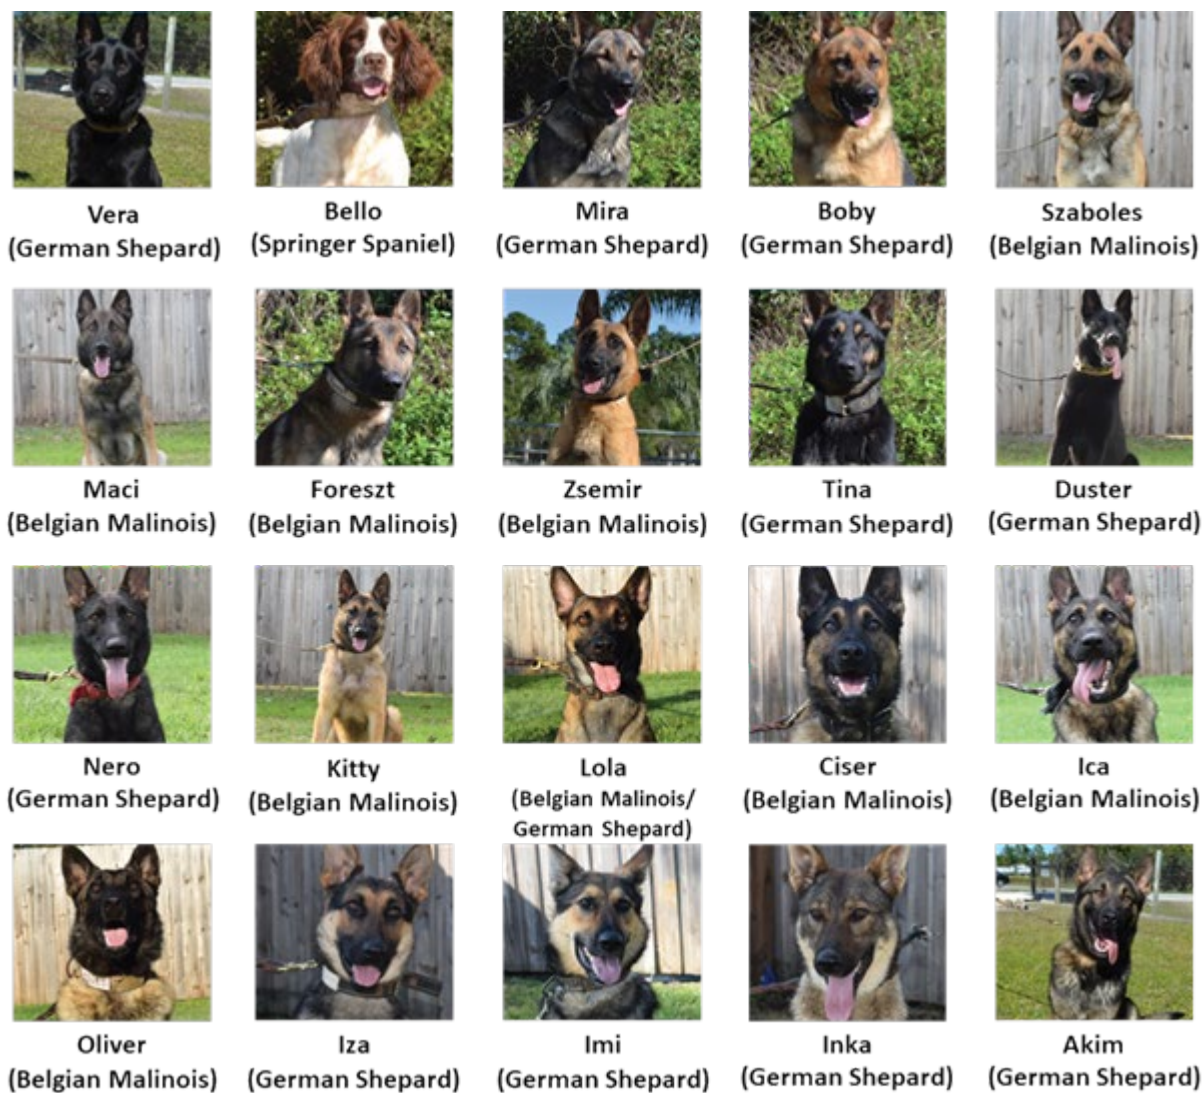

**Fig. S3. Group of 20 canines trained to detect CLas-infected citrus trees.** Various combinations of these canines were used throughout the experiments described in the paper.

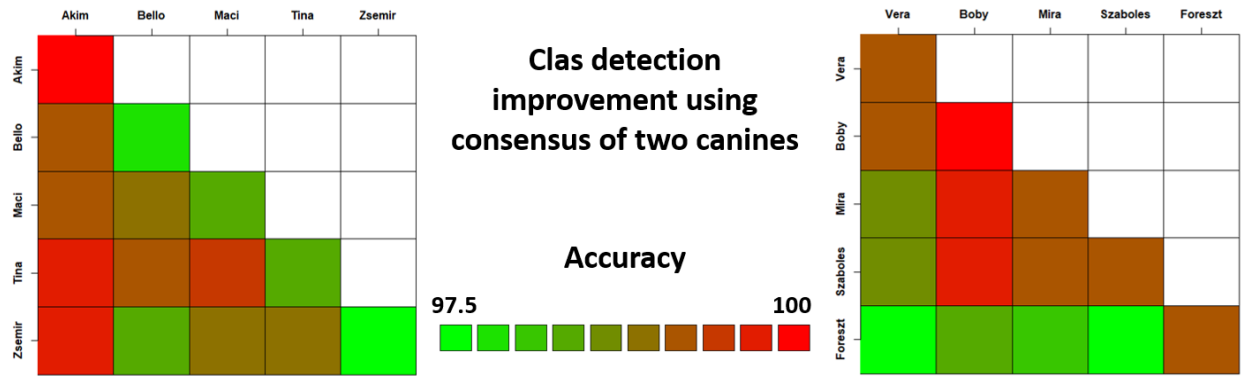

**Fig. S4. Results of consensus sampling by multiple canines.** Overall accuracy of canine CLas detection improves when using consensus of two or more canines. Data from 10 canines used in various combinations.

665

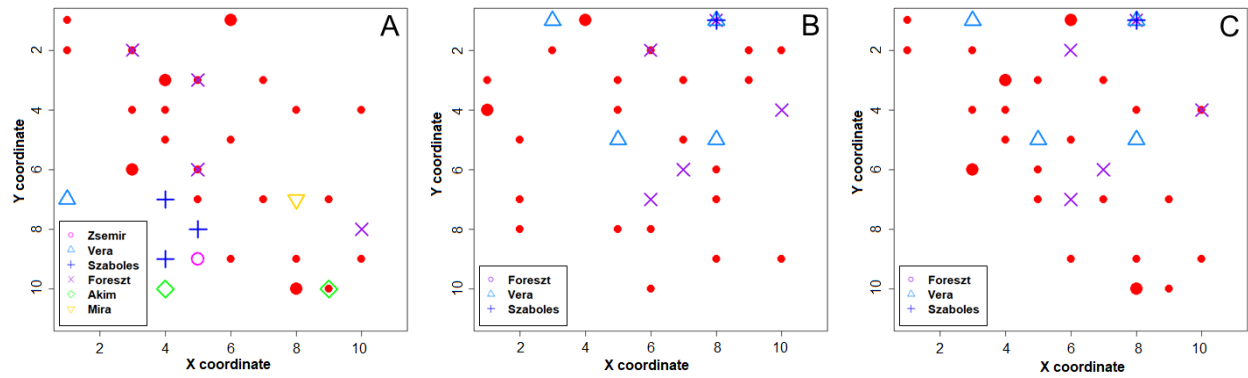

670 **Fig. S5. Spatial proximity of false canine detector FP errors to prior positions of TP CLAs-infected tree positions by canine.** Small red and large red dots, prior position of single and multiple CLAs-infected trees, respectively. Other markers indicate FP detection alert of individual canid (by given name) per legend. Marker overlaying red dot indicates FP canine alerts at prior position of CLAs-infected tree in prior trial. See Fig 2, error calculated over 10 canines for CLAs detection over 10 trials of 100 trees each, i.e. each canine interrogated 1000 trees.

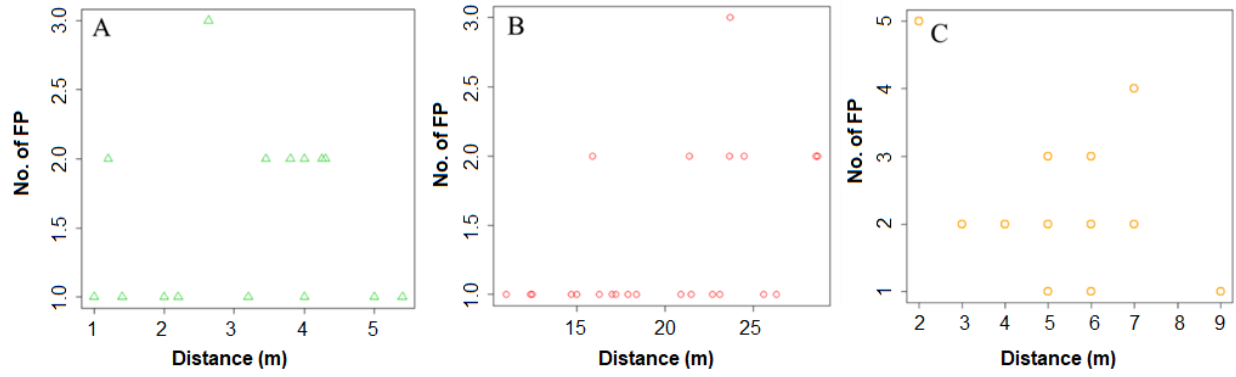

675 **Fig. S6. Spatial proximity of false positive (FP) indicated by CLAs detector canines.** A. Distance to the closest CLAs-infected tree. B. Distance to all CLAs-infected trees. C. Distance of FN alerts to perimeter of study plot. See Fig 2, error calculated over 10 canines for CLAs detection over 10 trials of 100 trees each, i.e. each canine interrogated 1000 trees.

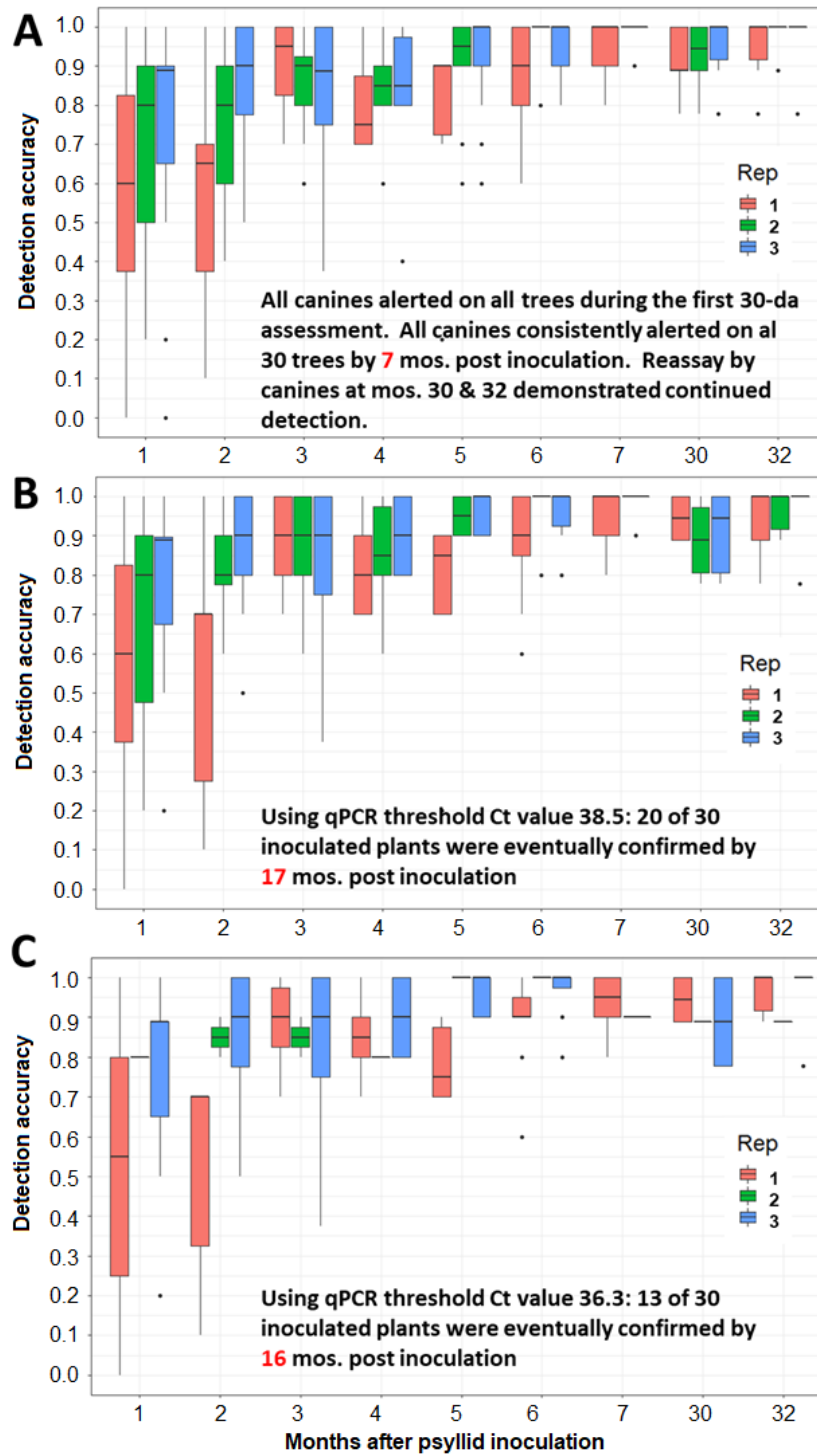

680

**Fig. 7. Canine detection accuracy by monthly assay date.** Canine assays were replicated 3 times on each assay date using 10 canines. A. Canine detection results irrespective of qPCR confirmation. B. Canine detection results considering qPCR confirmation using regulatory threshold of Ct < 38.5, and C. Ct < 36.3. Once canine detection reached an optimum at 7 months canine assays were discontinued but resumed at 30 and 32 months to demonstrate that canines as a group maintained at >90% detection over time.

685

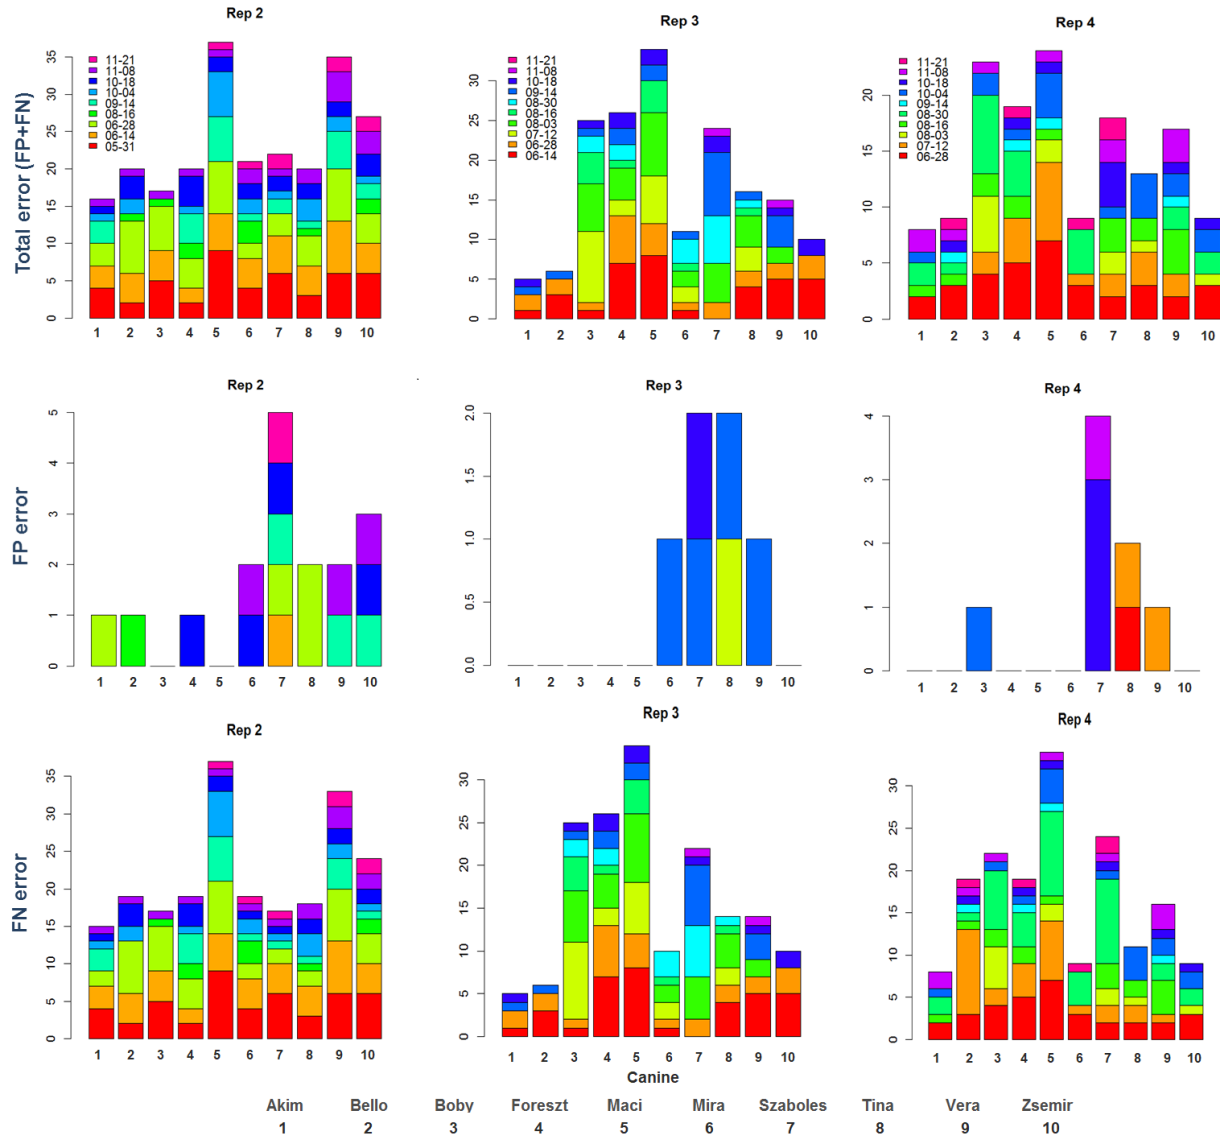

**Fig. S8. Temporal assessment of canine subclinical detection of CLas-infection. Assessment of error associated with subclinical detection of CLas-infection.** Total error, FP and FN error associated with each of 10 canines for three replicates of the experiment (Top panel row). Each bar is cumulative error across all assay dates. Color within each bar denotes error contributed by individual assay date.

690



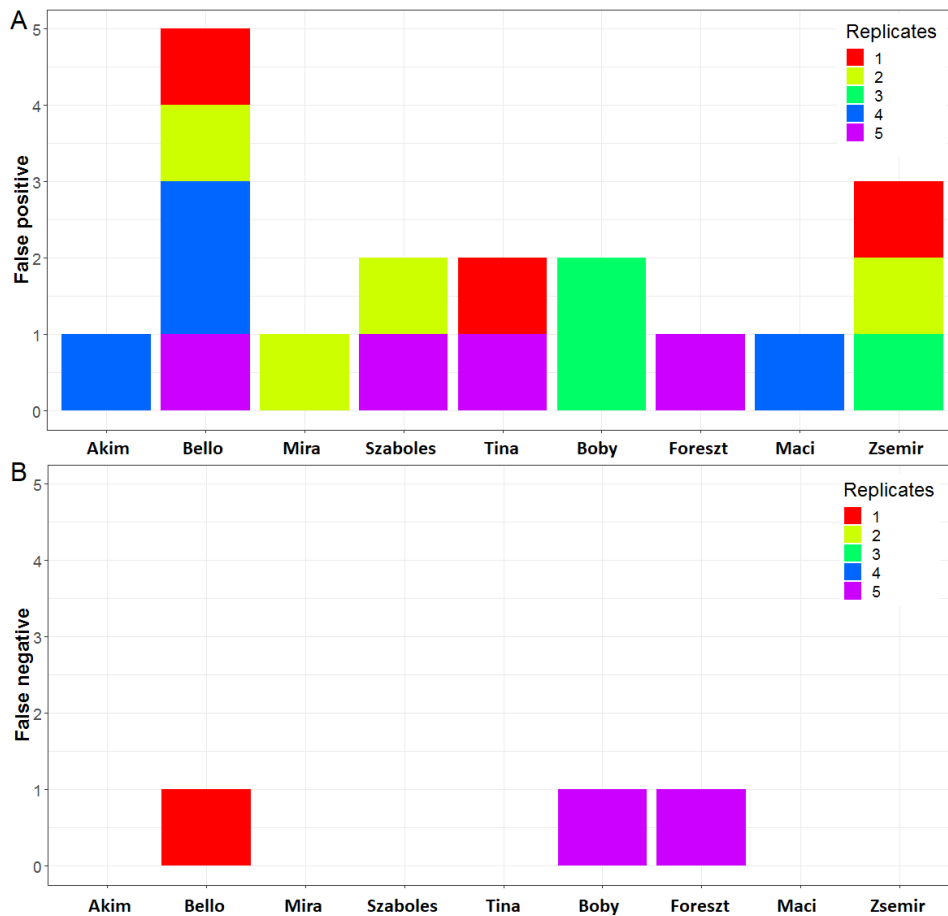

695

| Canine diagnostic test outcomes |                               |                |      | TP  | 72     |
|---------------------------------|-------------------------------|----------------|------|-----|--------|
|                                 |                               |                |      | TN  | 1032   |
|                                 |                               |                |      | FP  | 3      |
|                                 |                               |                |      | FN  | 18     |
|                                 |                               |                |      | SEN | 0.8000 |
|                                 |                               |                |      | SPC | 0.9971 |
|                                 |                               |                |      | PPV | 0.9600 |
|                                 |                               |                |      | NPV | 0.9829 |
|                                 |                               |                |      | FPR | 0.0029 |
|                                 |                               |                |      | FDR | 0.0400 |
|                                 |                               |                |      | ACC | 0.9813 |
| Canine Assay                    |                               | True Condition |      |     |        |
|                                 |                               | +              | -    |     |        |
| +                               | 75                            | 72             | 3    |     |        |
| -                               | 1050                          | 18             | 1032 |     |        |
| 1125                            | Total population ( <i>n</i> ) |                |      |     |        |
| 1.9%                            | Total Error Rate              |                |      |     |        |
| 1.6%                            | False Negative Error Rate     |                |      |     |        |
| 0.3%                            | False Positive Error Rate     |                |      |     |        |

**Fig. S9. Canine detection of CLas-infection from root tissue.** Each of 9 canines interrogated 5 replications of 25 root samples with 2 CLas-infected samples in each 25-sample grid. Color within each bar indicates contribution of individual replicate to: A. false positive, or B. false negative error. C. Latent class metrics for canine detection of CLas-infected in Root tissue compiled over 5 replicates.

700

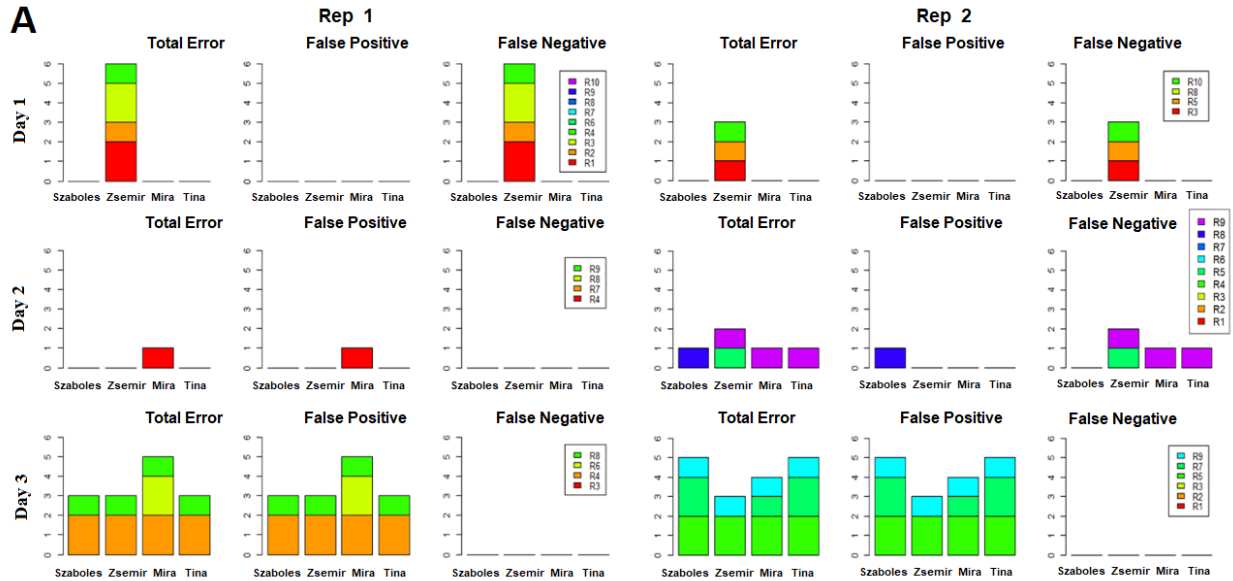

|              |                           | Canine diagnostic test outcomes |      | TP  | 139    |
|--------------|---------------------------|---------------------------------|------|-----|--------|
|              |                           | True Condition                  |      | TN  | 1795   |
|              |                           | +                               | -    | FP  | 5      |
| Canine Assay |                           | 144                             | 1800 | FN  | 5      |
| +            | 144                       | 139                             | 5    | SEN | 0.9653 |
| -            | 1800                      | 5                               | 1795 | SPC | 0.9972 |
|              |                           |                                 |      | PPV | 0.9653 |
| 1944         | Total population ( $n$ )  |                                 |      | NPV | 0.9972 |
| 0.5%         | Total Error Rate          |                                 |      | FPR | 0.0028 |
| 0.3%         | False Negative Error Rate |                                 |      | FDR | 0.0347 |
| 0.3%         | False Positive Error Rate |                                 |      | ACC | 0.9949 |

705 **Fig. S10. Canine discrimination of CLAs from other infectious citrus pathogens.** A. Four canines interrogated *in vivo* CLAs and other infectious citrus pathogens from the exotic citrus pathogen collection housed at USDA, ARS in Beltsville, Maryland over 3 days. B. Latent class metrics for canine detection of CLAs-infected accessions compiled over a 3-day trial.

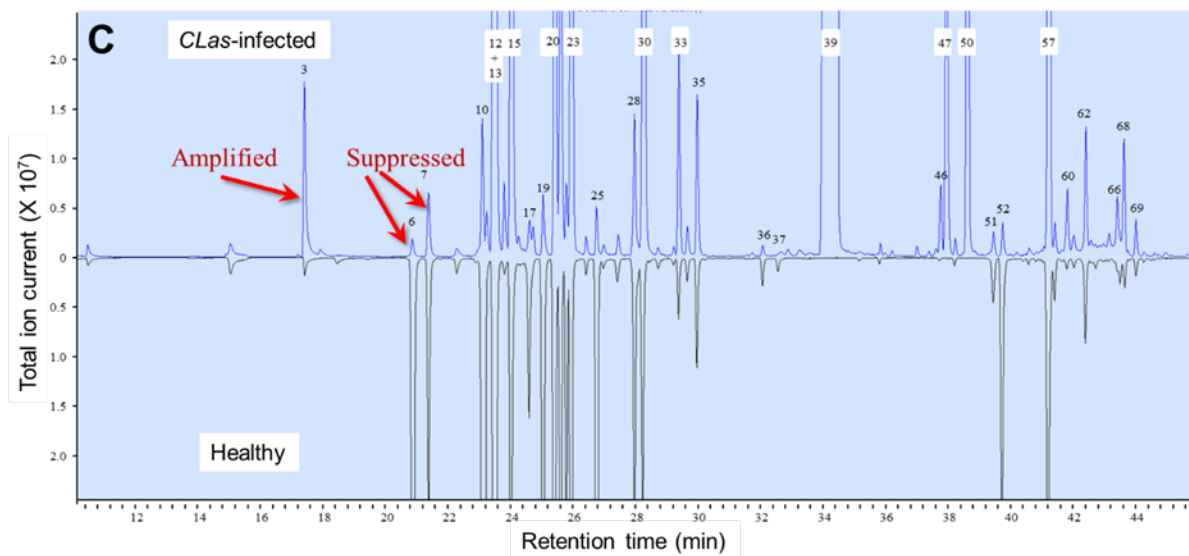

710

**Fig. S11. Volatile organic compound (VOC) assay of CLas-infected versus healthy trees. C.** Comparison of VOCs from CLas-infected (blue) and healthy (black) Marsh grapefruit leaves via GC-MS. Note some VOCs are up-regulated ‘amplified’ and others down regulated ‘suppressed’ in CLas-infected leaves (Table S3 and S Methods).

715

| A            |                           | Canine diagnostic test outcomes |     | TP  | 72     |
|--------------|---------------------------|---------------------------------|-----|-----|--------|
|              |                           | True Condition                  |     | TN  | 720    |
|              |                           | +                               | -   | FP  | 0      |
| Canine Assay |                           | 80                              | 720 | FN  | 8      |
| +            | 72                        | 72                              | 0   | SEN | 0.9000 |
| -            | 728                       | 8                               | 720 | SPC | 1.0000 |
|              |                           |                                 |     | PPV | 1.0000 |
| 800          | Total population ( $n$ )  |                                 |     | NPV | 0.9890 |
| 1.0%         | Total Error Rate          |                                 |     | FPR | 0.0000 |
| 1.0%         | False Negative Error Rate |                                 |     | FDR | 0.0000 |
| 0.0%         | False Positive Error Rate |                                 |     | ACC | 0.9900 |

  

| B            |                           | Canine diagnostic test outcomes |    | TP  | 6      |
|--------------|---------------------------|---------------------------------|----|-----|--------|
|              |                           | True Condition                  |    | TN  | 54     |
|              |                           | +                               | -  | FP  | 0      |
| Canine Assay |                           | 6                               | 54 | FN  | 0      |
| +            | 6                         | 6                               | 0  | SEN | 1.0000 |
| -            | 54                        | 0                               | 54 | SPC | 1.0000 |
|              |                           |                                 |    | PPV | 1.0000 |
| 60           | Total population ( $n$ )  |                                 |    | NPV | 1.0000 |
| 0.0%         | Total Error Rate          |                                 |    | FPR | 0.0000 |
| 0.0%         | False Negative Error Rate |                                 |    | FDR | 0.0000 |
| 0.0%         | False Positive Error Rate |                                 |    | ACC | 1.0000 |

720 **Fig. S12. Latent class metrics for canine detection of CLas-infected non-citrus hosts.** A. *Catharanthus roseus* data compiled over 2 replications, each using 4 canines and 10 runs of 10 plants/run to interrogate the mixed *in vivo*-infected/non-infected plant populations. B. *Nicotiana suaveolens (benthamiana)* data for 6 canines that interrogated a line of 10 plants composed of 8 CLas-negative citrus, one CLas positive citrus (positive control) and one CLas-infected *N. benthamiana* randomly placed in the line.

|              |                               | Canine diagnostic test outcomes |     | TP  | 46     |
|--------------|-------------------------------|---------------------------------|-----|-----|--------|
|              |                               | True Condition                  |     | TN  | 482    |
|              |                               | +                               | -   | FP  | 8      |
| Canine Assay |                               | 50                              | 490 | FN  | 4      |
| +            | 54                            | 46                              | 8   | SEN | 0.9200 |
| -            | 486                           | 4                               | 482 | SPC | 0.9837 |
|              |                               |                                 |     | PPV | 0.8519 |
| 540          | Total population ( <i>n</i> ) |                                 |     | NPV | 0.9918 |
| 2.2%         | Total Error Rate              |                                 |     | FPR | 0.0163 |
| 0.7%         | False Negative Error Rate     |                                 |     | FDR | 0.1481 |
| 1.5%         | False Positive Error Rate     |                                 |     | ACC | 0.9778 |

725

**Fig. S13. Latent class metrics for canine detection of CLas-bacterialiferous Asian citrus psyllids.** Data compiled over 2 days, each using 3 canines, 9 repetitions of 10 cans/repetition. Each can (station) held a cage containing a population of 20 CLas-positive or CLas-negative psyllids.

730

| A            |                               |                |     | Canine diagnostic test outcomes |          | TP         | 11 | Full concentration |  |
|--------------|-------------------------------|----------------|-----|---------------------------------|----------|------------|----|--------------------|--|
|              |                               | True Condition |     | TN                              | 108      | qPCR Ct =  |    | 25.32              |  |
|              |                               | +              | -   | FP                              | 0        | Copy No. = |    | 135722             |  |
| Canine Assay |                               | 12             | 108 | FN                              | 1        |            |    |                    |  |
| +            | 11                            | 11             | 0   | SEN                             | 0.9167   |            |    |                    |  |
| -            | 109                           | 1              | 108 | SPC                             | 1.0000   |            |    |                    |  |
|              |                               |                |     | PPV                             | 1.0000   |            |    |                    |  |
| 120          | Total population ( <i>n</i> ) |                |     | NPV                             | 0.9908   |            |    |                    |  |
| 0.8%         | Total Error Rate              |                |     | FPR                             | 0.0000   |            |    |                    |  |
| 0.8%         | False Negative Error Rate     |                |     | FDR                             | 0.0000   |            |    |                    |  |
| 0.0%         | False Positive Error Rate     |                |     | ACC                             | 0.9917   |            |    |                    |  |
|              |                               |                |     | <i>P</i>                        | 1.00E-12 |            |    |                    |  |

  

| B            |                               |                |     | Canine diagnostic test outcomes |          | TP         | 10 | Full concentration |  |
|--------------|-------------------------------|----------------|-----|---------------------------------|----------|------------|----|--------------------|--|
|              |                               | True Condition |     | TN                              | 107      | qPCR Ct =  |    | 37.93              |  |
|              |                               | +              | -   | FP                              | 1        | Copy No. = |    | 51                 |  |
| Canine Assay |                               | 12             | 108 | FN                              | 2        |            |    |                    |  |
| +            | 11                            | 10             | 1   | SEN                             | 0.8333   |            |    |                    |  |
| -            | 109                           | 2              | 107 | SPC                             | 0.9907   |            |    |                    |  |
|              |                               |                |     | PPV                             | 0.9091   |            |    |                    |  |
| 120          | Total population ( <i>n</i> ) |                |     | NPV                             | 0.9817   |            |    |                    |  |
| 2.5%         | Total Error Rate              |                |     | FPR                             | 0.0093   |            |    |                    |  |
| 1.7%         | False Negative Error Rate     |                |     | FDR                             | 0.0909   |            |    |                    |  |
| 0.8%         | False Positive Error Rate     |                |     | ACC                             | 0.9750   |            |    |                    |  |
|              |                               |                |     | <i>P</i>                        | 1.00E-12 |            |    |                    |  |

  

| C            |                               |                |     | Canine diagnostic test outcomes |          | TP         | 5 | Full concentration |  |
|--------------|-------------------------------|----------------|-----|---------------------------------|----------|------------|---|--------------------|--|
|              |                               | True Condition |     | TN                              | 107      | qPCR Ct =  |   | ND                 |  |
|              |                               | +              | -   | FP                              | 1        | Copy No. = |   | 0                  |  |
| Canine Assay |                               | 12             | 108 | FN                              | 7        |            |   |                    |  |
| +            | 6                             | 5              | 1   | SEN                             | 0.4167   |            |   |                    |  |
| -            | 114                           | 7              | 107 | SPC                             | 0.9907   |            |   |                    |  |
|              |                               |                |     | PPV                             | 0.8333   |            |   |                    |  |
| 120          | Total population ( <i>n</i> ) |                |     | NPV                             | 0.9386   |            |   |                    |  |
| 6.7%         | Total Error Rate              |                |     | FPR                             | 0.0093   |            |   |                    |  |
| 5.8%         | False Negative Error Rate     |                |     | FDR                             | 0.1667   |            |   |                    |  |
| 0.8%         | False Positive Error Rate     |                |     | ACC                             | 0.9333   |            |   |                    |  |
|              |                               |                |     | <i>P</i>                        | 1.00E-24 |            |   |                    |  |

735 **Fig. S14. Latent class metrics for canine detection of CLas co-culture.** A. Co-culture at full strength and B. Co-culture diluted to  $10^{-4}$ , and C. Co-culture diluted to  $10^{-6}$ , below qPCR detection thresholds. Data compiled over 2 days, 3 replications per day of 10 stations per replication, using 2 canines per replication. Copy number was calculated for 200 $\mu$ l of co-culture solution, the volume pipetted onto filter pads and interrogated by each canines. *P* = probability of correct indication of the co-culture by chance in repeated trials with multiple canines.

740

|              |                               | Canine diagnostic test outcomes |      | TP  | 165    |
|--------------|-------------------------------|---------------------------------|------|-----|--------|
|              |                               | True Condition                  |      | TN  | 3453   |
|              |                               | +                               | -    | FP  | 100    |
| Canine Assay |                               | 232                             | 3553 | FN  | 67     |
| +            | 265                           | 165                             | 100  | SEN | 0.7112 |
| -            | 3520                          | 67                              | 3453 | SPC | 0.9719 |
|              |                               |                                 |      | PPV | 0.6226 |
| 3785         | Total population ( <i>n</i> ) |                                 |      | NPV | 0.9810 |
| 4.4%         | Total Error Rate              |                                 |      | FPR | 0.0281 |
| 1.8%         | False Negative Error Rate     |                                 |      | FDR | 0.3774 |
| 2.6%         | False Positive Error Rate     |                                 |      | ACC | 0.9559 |

745 **Fig. S15. Latent class metrics for canine detection of CLAs in canine commercial citrus orchard blocks in Weslaco, Rio Grande valley of South Texas, USA.** Data were compiled over 2 separate multi-day trips to Texas using 4, and 9 canines per trip, respectively, and using multiple commercial citrus blocks. Data presented are a compilation of total trees interrogated by one or more canines over all trips.

| A            |                               | Canine diagnostic test outcomes |    | TP  | 25     |
|--------------|-------------------------------|---------------------------------|----|-----|--------|
|              |                               | True Condition                  |    | TN  | 18     |
|              |                               | +                               | -  | FP  | 1      |
| Canine Assay |                               | 28                              | 19 | FN  | 3      |
| +            | 26                            | 25                              | 1  | SEN | 0.8929 |
| -            | 21                            | 3                               | 18 | SPC | 0.9474 |
|              |                               |                                 |    | PPV | 0.9615 |
| 47           | Total population ( <i>n</i> ) |                                 |    | NPV | 0.8571 |
| 8.5%         | Total Error Rate              |                                 |    | FPR | 0.0526 |
| 6.4%         | False Negative Error Rate     |                                 |    | FDR | 0.0385 |
| 2.1%         | False Positive Error Rate     |                                 |    | ACC | 0.9149 |

  

| B            |                               | Canine diagnostic test outcomes |    | TP  | 12     |
|--------------|-------------------------------|---------------------------------|----|-----|--------|
|              |                               | True Condition                  |    | TN  | 13     |
|              |                               | +                               | -  | FP  | 1      |
| Canine Assay |                               | 13                              | 14 | FN  | 1      |
| +            | 13                            | 12                              | 1  | SEN | 0.9231 |
| -            | 14                            | 1                               | 13 | SPC | 0.9286 |
|              |                               |                                 |    | PPV | 0.9231 |
| 27           | Total population ( <i>n</i> ) |                                 |    | NPV | 0.9286 |
| 7.4%         | Total Error Rate              |                                 |    | FPR | 0.0714 |
| 3.7%         | False Negative Error Rate     |                                 |    | FDR | 0.0769 |
| 3.7%         | False Positive Error Rate     |                                 |    | ACC | 0.9259 |

  

| C            |                               | Canine diagnostic test outcomes |    | TP  | 37     |
|--------------|-------------------------------|---------------------------------|----|-----|--------|
|              |                               | True Condition                  |    | TN  | 31     |
|              |                               | +                               | -  | FP  | 2      |
| Canine Assay |                               | 41                              | 33 | FN  | 4      |
| +            | 39                            | 37                              | 2  | SEN | 0.9024 |
| -            | 35                            | 4                               | 31 | SPC | 0.9394 |
|              |                               |                                 |    | PPV | 0.9487 |
| 74           | Total population ( <i>n</i> ) |                                 |    | NPV | 0.8857 |
| 8.1%         | Total Error Rate              |                                 |    | FPR | 0.0606 |
| 5.4%         | False Negative Error Rate     |                                 |    | FDR | 0.0513 |
| 2.7%         | False Positive Error Rate     |                                 |    | ACC | 0.9189 |

750 **Fig. S16. Latent class metrics for canine detection of CLAs in residential citrus properties in Orange and Los Angeles Cos. of Southern California, USA.** Latent class metrics shown for A. validation trip 1, B. validation trip 2, and C. overall. Each residence was interrogated by 2 canines, and a third canine was used to resolve any conflict in detection. All data from the 2-3 canines per residence utilized in metric calculations.

755



Initial CLAs infections occur most frequently on the perimeter of citrus blocks

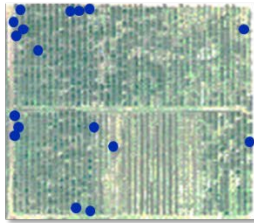

**Determine if CLAs is in the block**

- Perimeter or Deep perimeter survey

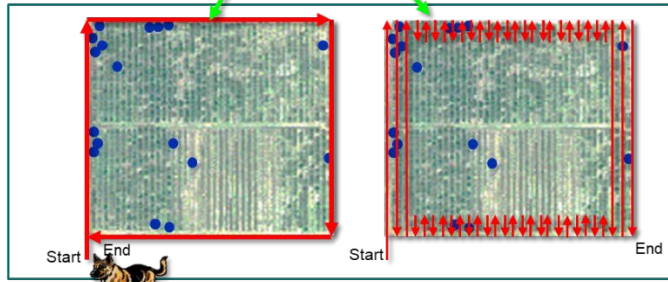

**Estimate CLAs incidence**

- Various stratified survey designs

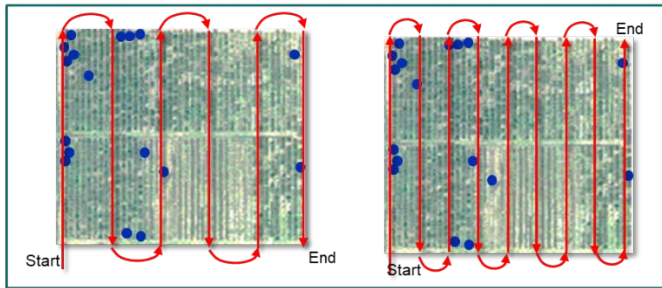

**Find all CLAs-infected trees**

- Complete census of all rows all trees

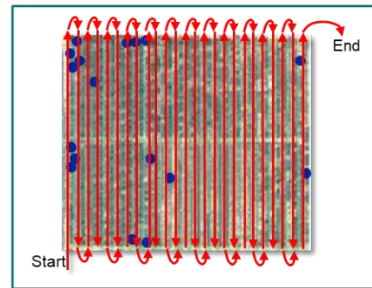

**Fig. S17. Canine deployment strategies for CLAs detection.** Example citrus orchard with initial heterogeneous spatial distribution of CLAs-infected trees indicated as blue dots (Top left). Perimeter (outer row and trees at end of row) and deep-perimeter (outer 2-3 rows and 2-3 trees at each end of rows) survey designs, path of canine detection team indicated by red arrows (Top center and right). Stratified survey designs at various intensity for estimation of CLAs incidence (Bottom right and center). Complete census survey for greatest accuracy estimate of CLAs infection and location of all known CLAs-infected trees (right). Simulation results - percent detection of HLB (CLAs infection) using various deployment strategies of 138 citrus blocks with <2% CLAs infection.

760

765

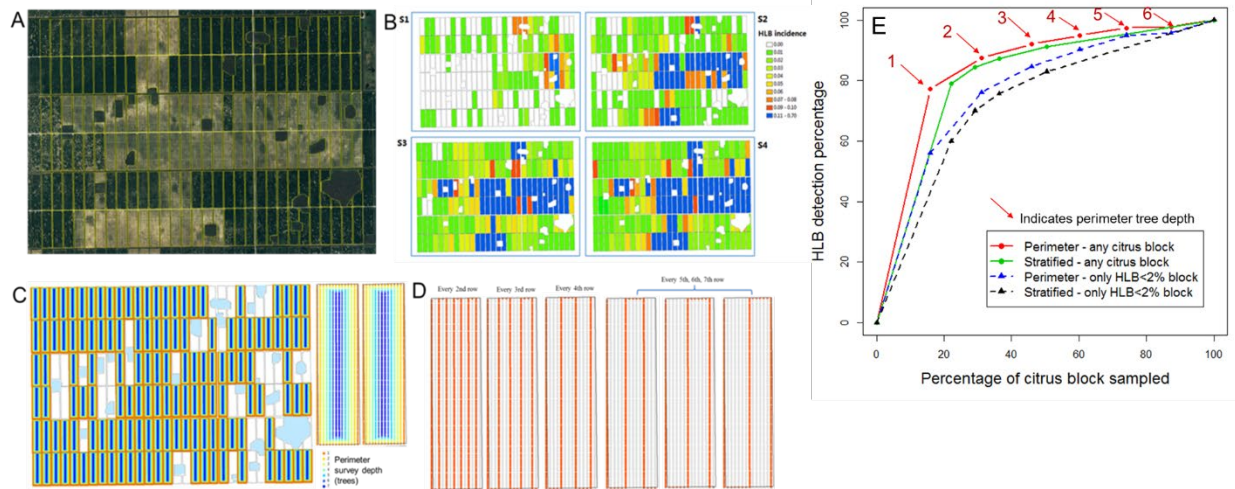

770 **Fig. S18. Simulation of deployment strategies of CLAs detector canines.** A. Large citrus  
 775 orchard in South Florida used for basis of simulation study consisting of 180 10-acre blocks. B.  
 Graphical representation of the orchard showing diseases incidence of each block during four  
 visual temporal assessments from November 2006 to March 2007. The spatial position of 451  
 CLAs-infected blocks was used to assess survey method performance. C. Perimeter survey design  
 of various depth in different colors. D. Stratified survey designs of varying intensity used for  
 comparison. E Percentage of CLAs-infected trees detected versus percentage of total citrus block  
 surveyed.

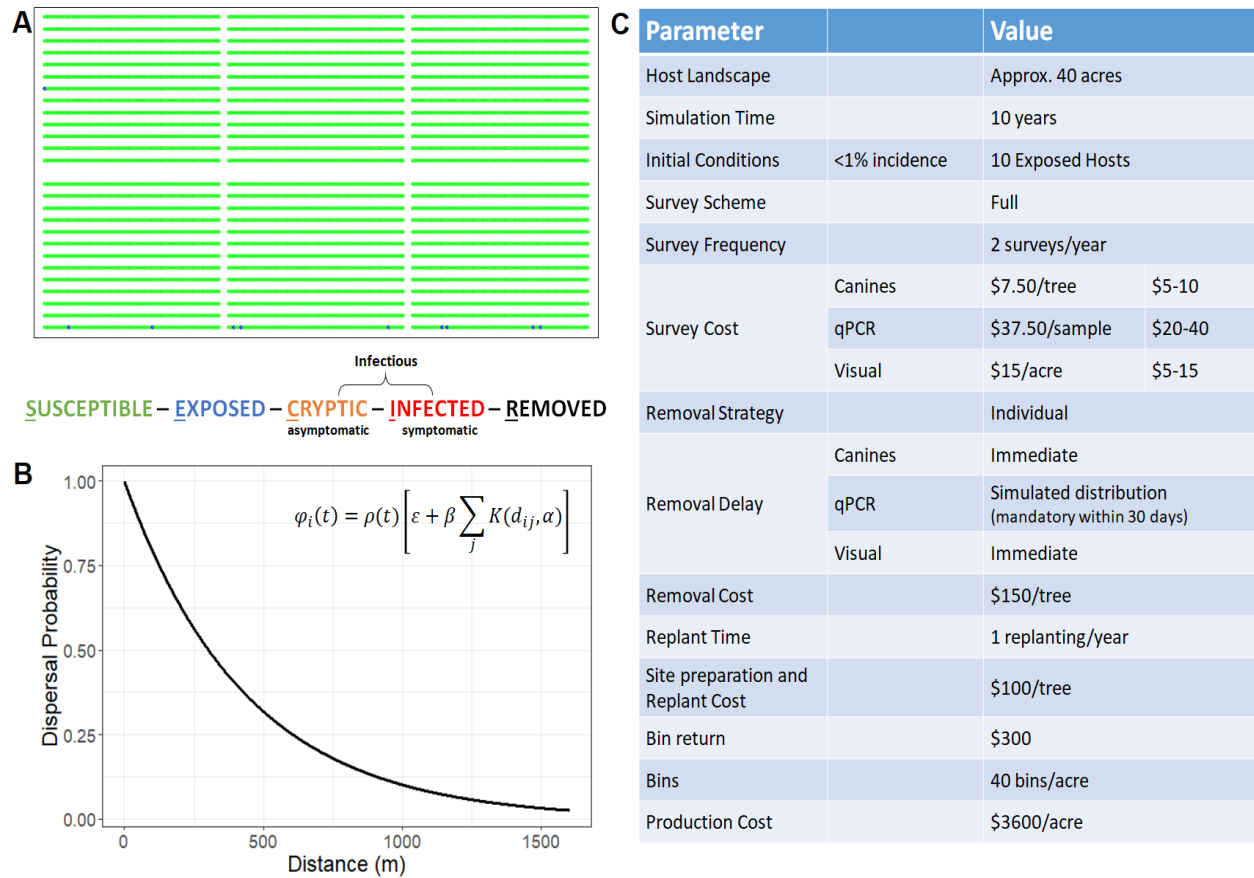

780 **Fig. S19. SECIR model simulation design and parameterization.** A. Host landscape with randomly  
 simulated 10 initial CLAs-exposed trees on the lower border of the planting indicated by blue dots,  
 healthy trees green dots. B. Generalized psyllid dispersal of CLAs over distance. C. Parameter values  
 used to populate the model based actual management costs (can be redefined by user). Simulations  
 run 10,000 times to generate outputs for Figs. 4, S22, S23, S24.

785

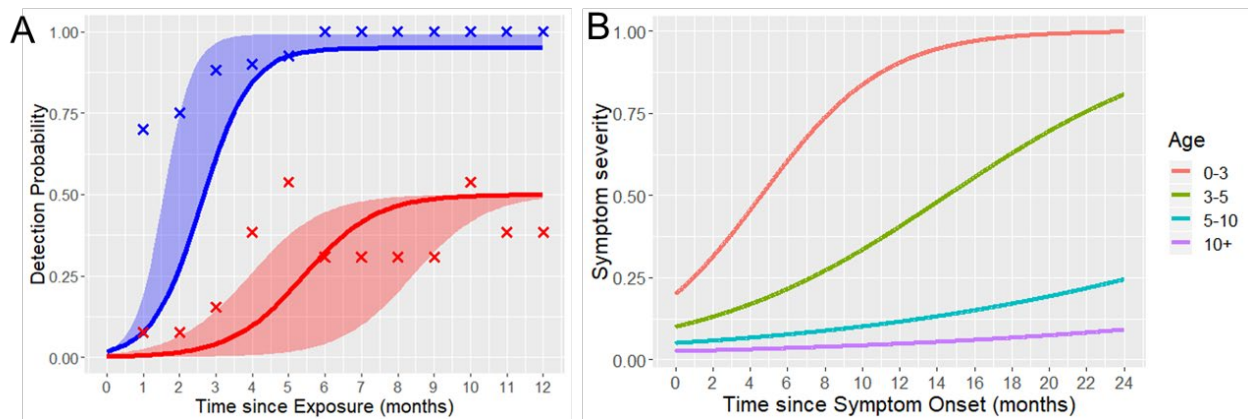

790 **Fig. S20. Probability of detection of CLAs infection of citrus trees over time based on visual, PCR and canine detection methods.** A) Simulation settings for canines (blue line) and PCR (red line) detection within the range determined via psyllid study data. B) Symptom development with citrus host canopy based on tree age augmenting detection.

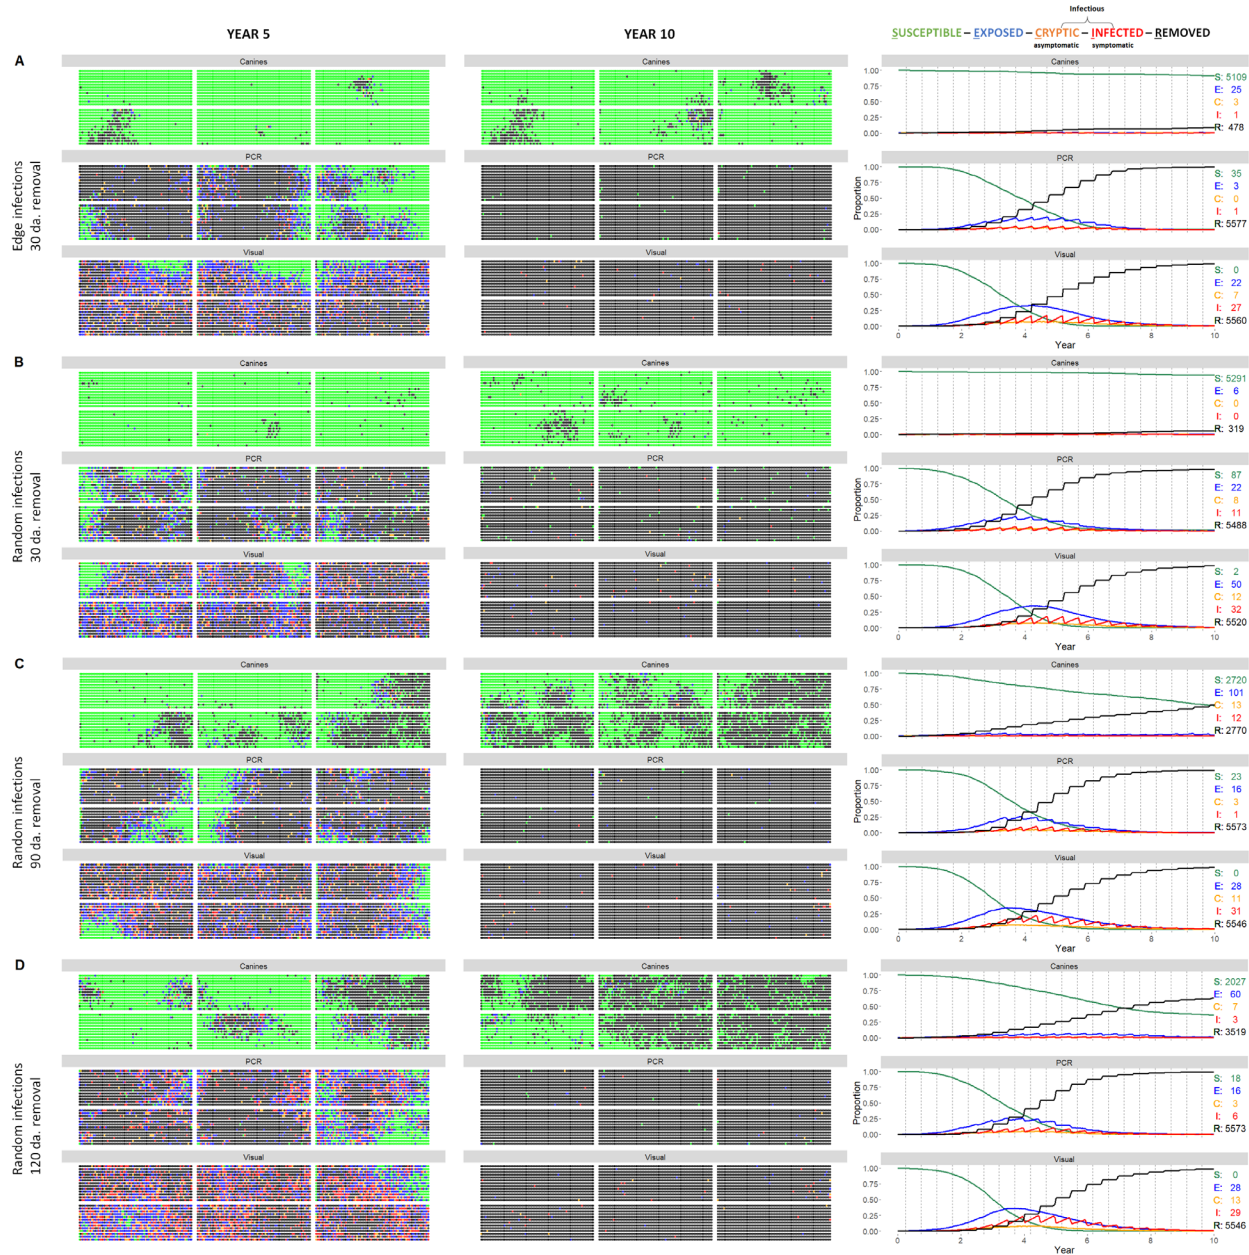

795 **Fig. S21. Simulation scenarios investigating initial conditions and removal protocols over a**  
**10 year period.** Results from a single simulation run of (A) 10 initial edge infections and  
removal within 30 da. post detection, (B) 10 random infections and removal within 30 da. post  
detection, (C) 10 random infections and removal within 90 da. post detection, and (D) 10 random  
infections and removal within 120 da. post detection. Epidemic snapshots of the orchard at 5 and  
10 year time points, and the disease dynamics with resulting tree numbers by disease status for  
800 each scenario.

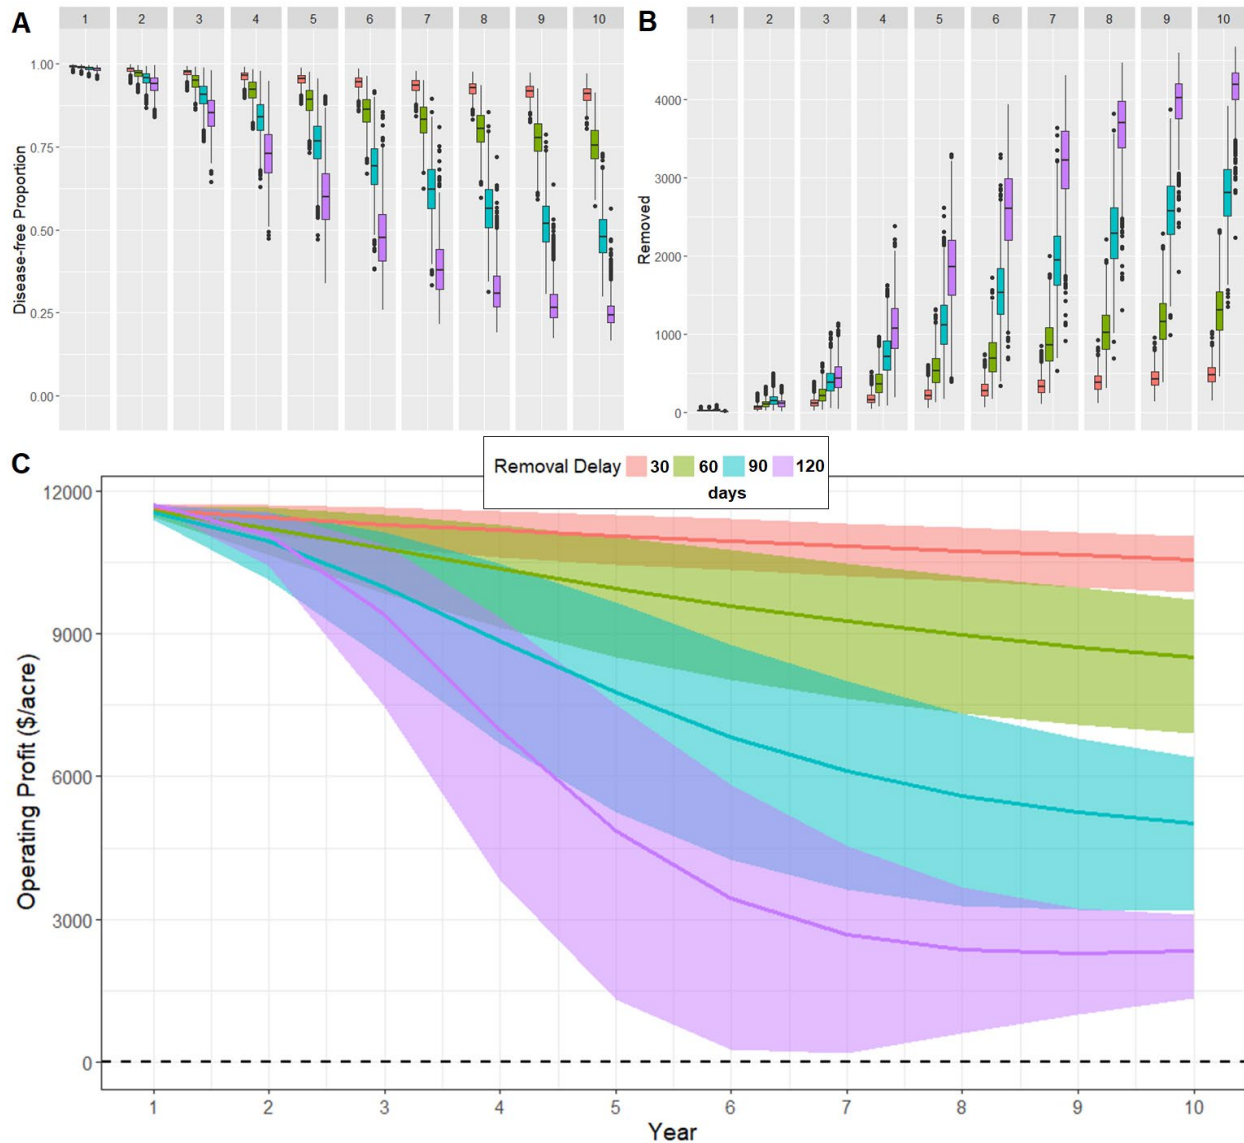

**Figure S22. Simulation study over a 10-year period comparing removal programs coupled with canine deployment.** Simulations were run 10,000 times to determine the (A) proportion of Susceptible hosts remaining, (B) number of trees removed post detection, and (C) 95% confidence intervals of the operating profit per acre each year when deploying canines with removal protocols mandating detected trees removal within 30 (red), 60 (green), 90 (blue), and 120 (purple) days. Simulations consider 2 surveillance cycles/yr, and operating profit calculations starting at the end of the first year. Dashed horizontal line denotes threshold of commercial citrus production operating profit/loss. Comparisons indicate that early detection paired with relatively prompt removal is required for long-term sustainability.

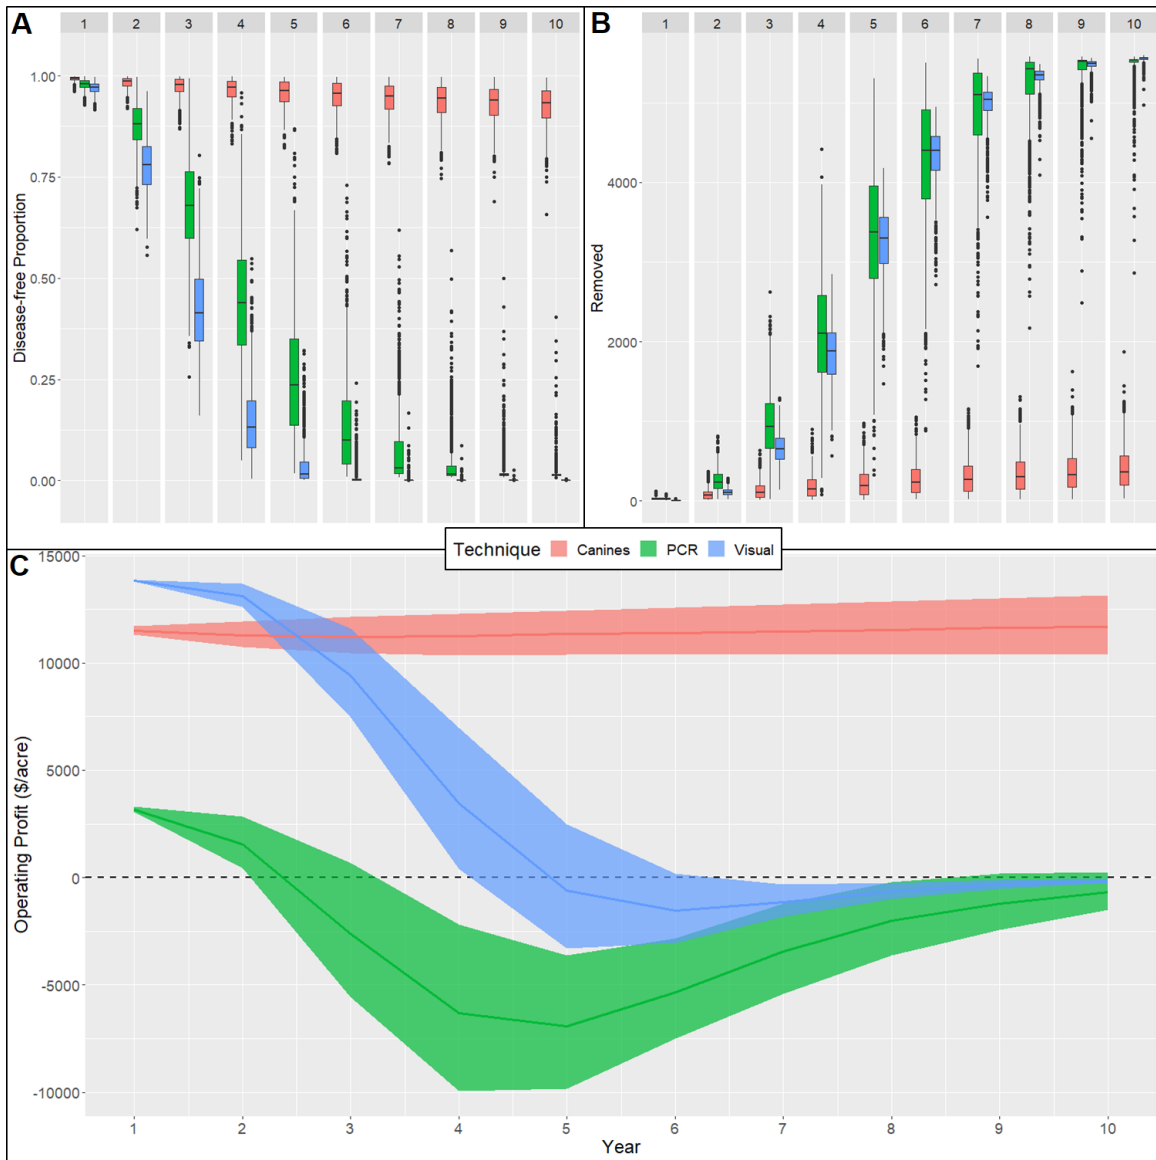

**Fig. S23. Simulation study over a 10-year period comparing early detection technologies and their program sustainability without infected tree replacement.** Simulations were run 10,000 times to determine the (A) proportion of Susceptible hosts remaining, (B) number of trees removed post detection, and (C) 95% confidence intervals of the operating profit per acre each year for canines (red), PCR (green), and visual (blue) scenarios. Simulations consider 2 surveillance cycles/yr, removal of infected trees within 30 days of discovery, without replacement of infected trees, and operating profit calculations starting at the end of the first year. Dashed horizontal line denotes threshold of commercial citrus production operating profit/loss. Note that profits are initially highest and lowest for visual and PCR detection because they are the least and most expensive, respectively. For visual and PCR scenarios, operating cost exceed earnings resulting in negative profits during year 3-10 for PCR and 5-10 for visual, returning to near zero profits at the end of 10 years. As 10 years is approached, there are only few trees left to surveil with PCR and visual detection, thus there are few fiscal outlays but no income when using either detection method, whereas, canine detection sustains both viable plantings and long-term profits.

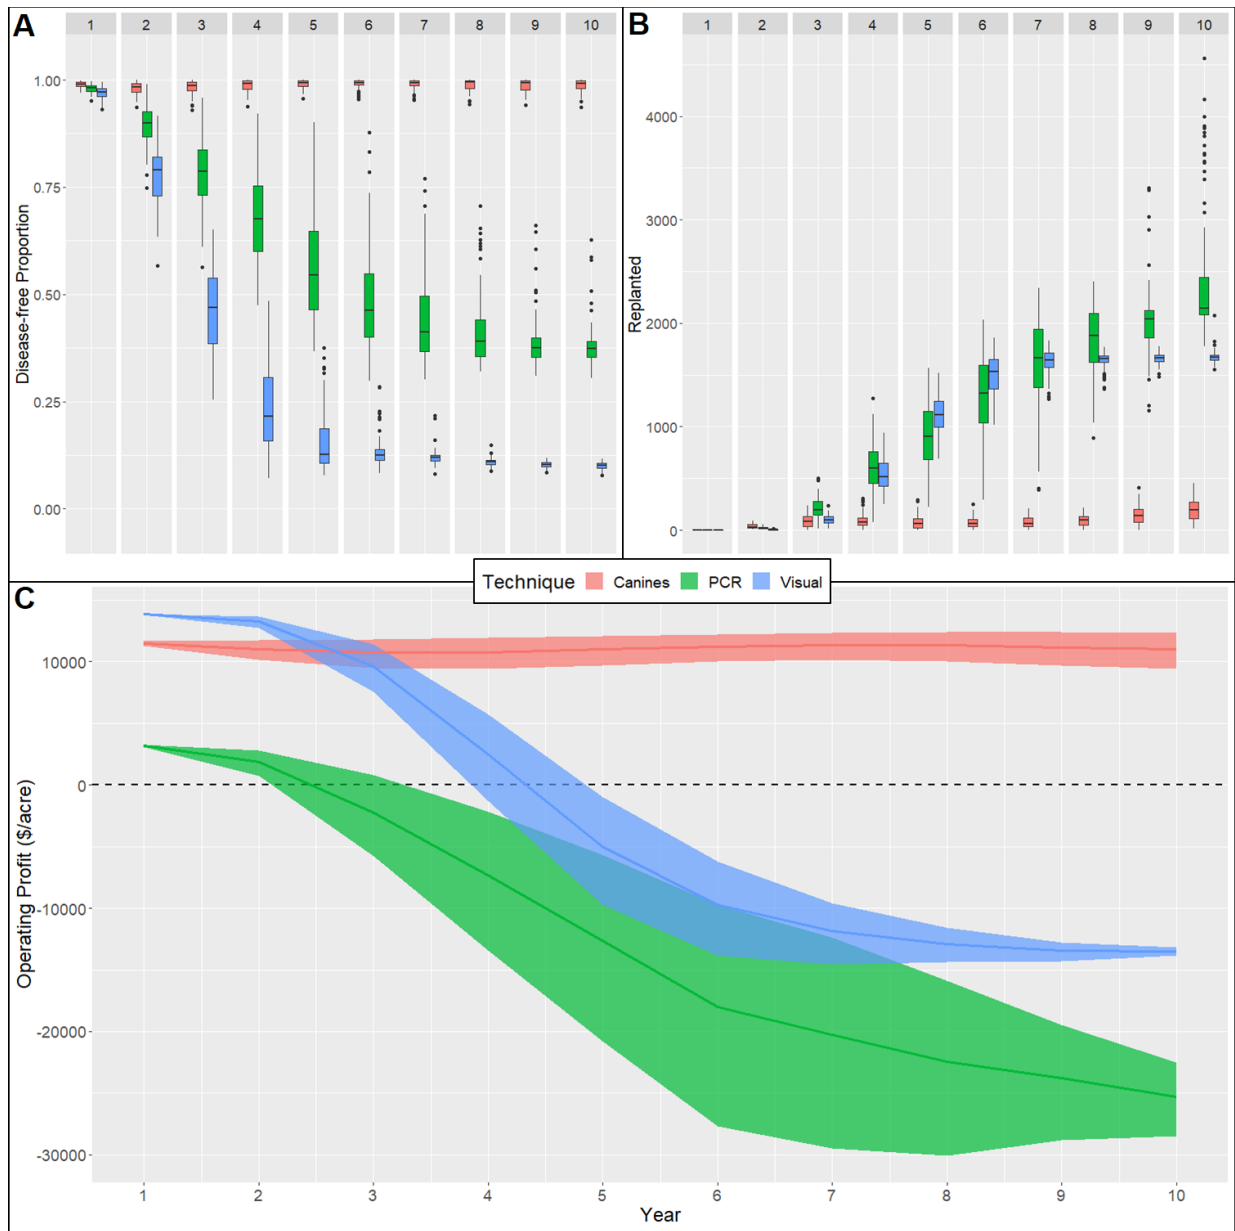

**Fig. S24. Simulation study over a 10-year period comparing early detection technologies and their program sustainability with infected tree replacement.** Simulations were run 10,000 times to determine the (A) proportion of Susceptible hosts remaining, (B) number of trees replanted, and (C) 95% confidence intervals of the operating profit per acre each year for canines (red), PCR (green), and visual (blue) scenarios. Simulations consider 2 surveillance cycles/yr, removal of infected trees within 30 days of discovery, replacement of cumulative prior-year infected trees once per year, and operating profit calculations starting at the end of the first year. Dashed horizontal line denotes threshold of commercial citrus production operating profit/loss. Note that profits are initially highest and lowest for visual and PCR detection because they are the least and most expensive, respectively. For visual and PCR scenarios, operating cost exceed earnings resulting in negative profits during year 3-10 for PCR and 5-10 for visual, returning to near zero profits at the end of 10 years.



840 **Table S1. Performance assessment metrics for CLas-infected tree detector canines<sup>a</sup>.**

| Performance Metric                         | Canine Detector |        |        |        |        |        |        |                   |          |         | All canines |
|--------------------------------------------|-----------------|--------|--------|--------|--------|--------|--------|-------------------|----------|---------|-------------|
|                                            | Akim            | Bello  | Masi   | Tina   | Zsemir | Vera   | Bobby  | Mira <sup>b</sup> | Szaboles | Foreszt |             |
| True Positive (TP)                         | 38              | 32     | 33     | 32     | 28     | 36     | 36     | 16                | 35       | 40      | 326         |
| True Negative (TN)                         | 956             | 956    | 957    | 958    | 957    | 954    | 960    | 479               | 956      | 951     | 9084        |
| False Positive (FP)                        | 4               | 4      | 3      | 2      | 3      | 6      | 0      | 1                 | 4        | 9       | 36          |
| False Negative (FN)                        | 2               | 8      | 7      | 8      | 12     | 4      | 4      | 4                 | 5        | 0       | 54          |
| Sensitivity- True Positive Rate (SEN)      | 0.9500          | 0.8000 | 0.8250 | 0.8000 | 0.7000 | 0.9000 | 0.9000 | 0.8000            | 0.8750   | 1.0000  | 0.8579      |
| Specificity - True Negative Rate (SPC)     | 0.9958          | 0.9958 | 0.9969 | 0.9979 | 0.9969 | 0.9938 | 1.0000 | 0.9979            | 0.9958   | 0.9906  | 0.9961      |
| Precision - Positive Predicted Value (PPV) | 0.9048          | 0.8889 | 0.9167 | 0.9412 | 0.9032 | 0.8571 | 1.0000 | 0.9412            | 0.8974   | 0.8163  | 0.9006      |
| Negative Predictive Value (NPV)            | 0.9979          | 0.9917 | 0.9927 | 0.9917 | 0.9876 | 0.9958 | 0.9959 | 0.9917            | 0.9948   | 1.0000  | 0.9941      |
| False Positive Rate (FPR)                  | 0.0042          | 0.0042 | 0.0031 | 0.0021 | 0.0031 | 0.0063 | 0.0000 | 0.0021            | 0.0042   | 0.0094  | 0.0039      |
| False Negative Rate (FNR)                  | 0.0500          | 0.2000 | 0.1750 | 0.2000 | 0.3000 | 0.1000 | 0.1000 | 0.2000            | 0.1250   | 0.0000  | 0.1421      |
| False Discovery Rate (FDR)                 | 0.0952          | 0.1111 | 0.0833 | 0.0588 | 0.0968 | 0.1429 | 0.0000 | 0.0588            | 0.1026   | 0.1837  | 0.0994      |
| Accuracy (ACC)                             | 0.9940          | 0.9880 | 0.9900 | 0.9900 | 0.9850 | 0.9900 | 0.9960 | 0.9900            | 0.9910   | 0.9910  | 0.9905      |

No single performance metric can capture all aspects of canine detection. Throughout this study we key on three commonly cited metrics; *sensitivity*, *specificity* and *accuracy* (outlined in red) with best and worst results among the 10 canines for each of these metrics indicated by green and red shading, respectively. However, we calculate and present a number of performance metrics in order to allow the reader to examine and interpret canine detection accuracy from various perspectives.

845 <sup>a</sup> Latent class metrics results from combined 10 trials per canine consisting of a 100 tree matrix with 0.04 incidence of CLas-infected trees randomized within the matrix. The 10 replicates per canine were pooled to estimate mean and variance for that canine.

850 <sup>b</sup> With the exception of one canine, who only participated in 5 of the 10 trials due to illness.

**Table S2. HLB detector canine cross-reaction studies at USDA, ARS International citrus pathogen collection Beltsville, MD.**

| <b>A</b>  |                                               |              |                 | <b>B</b>             |     |      |                      |            |           |
|-----------|-----------------------------------------------|--------------|-----------------|----------------------|-----|------|----------------------|------------|-----------|
| Accession | Pathogen/sample description                   | Origin       | Virus/Viroid    | Pathogen             |     |      | Pathogen             |            |           |
|           |                                               |              |                 | Origin               | CTV | CLas | Origin               | CTV        | CLas      |
| B1        | CLas                                          | Reunion      |                 | <b>USA</b>           |     |      | <b>Australia</b>     | 1          |           |
| B49       | CLas                                          | South Africa |                 | California           | 17  | 5    | <b>South America</b> |            |           |
| B104      | CRSV-6B-1                                     | Florida      | Ringspot        | Florida              | 6   | 4    | Argentina            | 1          |           |
| B121      | CLas <i>Likubin</i>                           | Taiwan       |                 | Hawaii               | 8   |      | Brazil               | 11         |           |
| B141      | CLas                                          | Phillipines  |                 | <b>Mediterranean</b> |     |      | Colombia             | 10         |           |
| B144      | CLas                                          | China        |                 | Corsica              | 1   |      | Peru                 | 14         |           |
| B232      | CLas                                          | Thailand     |                 | France               | 1   |      | Venezuela            | 3          |           |
| B239      | CLas From SU, HYd-cy-1                        | Taiwan       |                 | Spain                | 22  |      | Belize               | 1          |           |
| B244      | TLV code SATdw-JC-3                           | Taiwan       | TLV, CTV        | Turkey               | 1   |      | <b>Caribbean</b>     |            |           |
| B245      | TLV code WN-86-2                              | Taiwan       | TLV             | <b>Asia</b>          |     |      | Bermuda              | 2          |           |
| B246      | ACD 17.GF/Tri - T. Roberts                    | Australia    | ACD, CTV?       | China                | 15  | 2    | Costa Rica           | 6          |           |
| B251      | Citrus Variegated Chlorosis                   | Brazil       | CVC, CTV        | India                | 14  | 1    | Cuba                 | 8          |           |
| B259      | Dwarfing Agent                                | Argentina    | Viroid/CTV?     | Japan                | 10  |      | Dominican Rep.       | 18         |           |
| B260      | Dwarfing Agent                                | Argentina    | Viroid/CTV?     | Philippines          | 3   | 1    | Guatemala            | 1          |           |
| B267      | CLas                                          | China        |                 | Indonesia            | 2   |      | Jamaica              | 1          |           |
| B332      | CCDV (Citrus Chlorotic Dwarf)                 | Turkey       | CCDV            | Malaysia             | 1   |      | Puerto Rico          | 6          |           |
| B384      | FS596 Meyer Lemon                             | Florida      | TLV, CTV        | Pakistan             |     | 1    | Trinidad             | 1          |           |
| B427      | CLas                                          | Brazil       |                 | Taiwan               | 17  | 2    | <b>Africa</b>        |            |           |
| B428      | CLas Rough Lemon Sample                       | Florida      |                 | Thailand             | 1   | 1    | South Africa         | 11         | 4         |
| B429      | CLas Valencia Sample                          | Florida      |                 |                      |     |      | Reunion              | 1          | 1         |
| B430      | CLas                                          | Japan        |                 |                      |     |      | <b>Totals</b>        | <b>246</b> | <b>22</b> |
| B431      | Stellenbosch                                  | South Africa |                 |                      |     |      |                      |            |           |
| B432      | ITSC Dark Valencia                            | South Africa |                 |                      |     |      |                      |            |           |
| B434      | Nelspruit                                     | South Africa |                 |                      |     |      |                      |            |           |
| B435      | Letaba                                        | South Africa |                 |                      |     |      |                      |            |           |
| B436      | CLas Sour Orange Sample                       | Florida      |                 |                      |     |      |                      |            |           |
| B437      | CLas Dover #4 - Ron Bransky                   | Florida      |                 |                      |     |      |                      |            |           |
| B438      | Hacienda Heights first CA find                | California   |                 |                      |     |      |                      |            |           |
| B439      | CLas via CA from Tyler Dang                   | China        |                 |                      |     |      |                      |            |           |
| B440      | CLas - Sagheer Atta                           | Pakistan     |                 |                      |     |      |                      |            |           |
| B441      | CLas <i>San Gabriel 41 42 Mandarin 150416</i> | California   |                 |                      |     |      |                      |            |           |
| B442      | CLas from India via California                | India        |                 |                      |     |      |                      |            |           |
| B443      | California 23 24 Mex lime 150416B             | California   |                 |                      |     |      |                      |            |           |
| B444      | California 32 34 Calamondin 150416C           | California   |                 |                      |     |      |                      |            |           |
| B445      | Claf HMV-5 via Fort Deterick - V. Damsteegt   | South Africa |                 |                      |     |      |                      |            |           |
| 189 Sw1   | Stubborn Georgios Vidilacus                   | California   | <i>S. citri</i> |                      |     |      |                      |            |           |
| 3291-7    | CLas                                          | California   |                 |                      |     |      |                      |            |           |
| Liberty   | Stubborn - R. Yokomi                          | California   | <i>S. citri</i> |                      |     |      |                      |            |           |
| S616      | Stubborn Georgios Vidilacus                   | California   | <i>S. citri</i> |                      |     |      |                      |            |           |

  

| <b>C</b>                        |                           |     |      |     |        |
|---------------------------------|---------------------------|-----|------|-----|--------|
| Canine diagnostic test outcomes |                           |     |      | TP  | 139    |
| True Condition                  |                           |     |      | TN  | 1795   |
|                                 |                           |     |      | FP  | 5      |
|                                 |                           |     |      | FN  | 5      |
| Canine Assay                    |                           |     |      | SEN | 0.9653 |
| +                               | 144                       | 139 | 5    | SPC | 0.9972 |
| -                               | 1800                      | 5   | 1795 | PPV | 0.9653 |
| 1934                            | Total population (n)      |     |      | NPV | 0.9972 |
| 0.5%                            | Total Error Rate          |     |      | FPR | 0.0028 |
| 0.3%                            | False Negative Error Rate |     |      | FDR | 0.0347 |
| 0.3%                            | False Positive Error Rate |     |      | ACC | 0.9949 |

855

A. Partial list of pathogens assessed by canines. B. number of isolates tested by country of origin. C. Latent class metrics for canine detection of CLAs and cross-reaction to other citrus pathogens.

**Table S3. GC-MS analysis of CLAs-infected versus healthy grapefruit *Citrus paradisi* leaf volatiles.**

| Peak # | Compound               | RT (min) | RI   | Abundance |         | Peak # | Compound                  | RT (min) | RI   | Abundance |         |
|--------|------------------------|----------|------|-----------|---------|--------|---------------------------|----------|------|-----------|---------|
|        |                        |          |      | HLB       | Healthy |        |                           |          |      | HLB       | Healthy |
| 1      | Penten-3-one           | 10.48    | 695  | 6.12      | 3.93    | 38     | (E,E)-2,4-Nonadienal      | 32.86    | 1226 | 4.39      | 0.00    |
| 2      | (Z)-3-Hexenal          | 14.87    | 802  | 10.22     | 16.19   | 39     | Linalool acetate          | 34.11    | 1259 | 4830.38   | 0.00    |
| 3      | (Z)-3-Hexen-1-ol       | 17.56    | 865  | 97.33     | 10.52   | 40     | Geranial                  | 34.62    | 1272 | 13.61     | 0.00    |
| 4      | 1-Henaxol              | 17.90    | 872  | 4.23      | 0.00    | 41     | Tridecane                 | 35.75    | 1302 | 4.63      | 2.66    |
| 5      | Bleed                  | 18.46    | 885  | 1.10      | 4.59    | 42     | Bornyl acetate            | 35.99    | 1309 | 1.15      | 0.00    |
| 6      | $\alpha$ -Thujene      | 20.84    | 940  | 9.82      | 543.19  | 43     | Linalyl propanoate        | 36.99    | 1337 | 4.57      | 0.00    |
| 7      | $\alpha$ -Pinene       | 21.35    | 952  | 36.58     | 126.54  | 44     | $\delta$ -Elemene         | 37.38    | 1348 | 2.15      | 0.00    |
| 8      | Camphene               | 22.26    | 973  | 7.68      | 10.47   | 45     | Linalool isobutanoate     | 37.61    | 1354 | 4.06      | 0.00    |
| 9      | Benzaldehyde           | 22.87    | 986  | 4.45      | 2.65    | 46     | p-Mentha-2,4(8)-diene     | 37.76    | 1358 | 34.47     | 1.42    |
| 10     | Sabinene               | 23.09    | 991  | 68.50     | 1096.47 | 47     | Neryl acetate             | 37.96    | 1364 | 386.62    | 0.00    |
| 11     | Bleed                  | 23.23    | 995  | 24.12     | 18.11   | 48     | $\alpha$ -Cubebene        | 38.22    | 1371 | 8.10      | 3.53    |
| 12     | Myrcene                | 23.43    | 999  | 512.44    | 244.72  | 49     | 24.19 7-epi-Sesquithujene | 38.47    | 1379 | 0.84      | 0.00    |
| 13     | $\beta$ -Pinene        | 23.53    | 1002 | 1012.55   | 204.70  | 50     | Geranyl acetate           | 38.65    | 1384 | 586.76    | 0.00    |
| 14     | Methyl-5-hepten-2-ol   | 23.78    | 1007 | 38.76     | 10.00   | 51     | $\alpha$ -Copaene         | 39.44    | 1407 | 12.57     | 27.01   |
| 15     | (Z)-3-Hexenyl acetate  | 24.05    | 1014 | 590.35    | 277.22  | 52     | $\beta$ -Elemene          | 39.73    | 1416 | 16.62     | 174.03  |
| 16     | Hexyl acetate          | 24.25    | 1018 | 11.88     | 0.00    | 53     | $\beta$ -Panasinene       | 40.19    | 1429 | 2.00      | 0.00    |
| 17     | $\alpha$ -Phellandrene | 24.60    | 1026 | 22.09     | 75.66   | 54     | Sativene                  | 40.38    | 1435 | 0.88      | 1.34    |
| 18     | $\delta$ -3-Carene     | 24.71    | 1029 | 15.04     | 0.00    | 55     | (Z)-Caryophyllene         | 40.58    | 1441 | 5.36      | 3.00    |
| 19     | $\alpha$ -Terpinene    | 25.03    | 1036 | 32.37     | 387.67  | 56     | $\gamma$ -Elemene         | 41.06    | 1456 | 3.98      | 1.42    |
| 20     | p-Cymene               | 25.43    | 1046 | 453.71    | 337.35  | 57     | (E)-Caryophyllene         | 41.24    | 1462 | 709.51    | 249.56  |
| 21     | Limonene               | 25.60    | 1050 | 250.12    | 260.26  | 58     | $\beta$ -Muuroleone       | 41.41    | 1467 | 17.36     | 20.72   |
| 22     | $\beta$ -Phellandrene  | 25.78    | 1054 | 35.09     | 147.67  | 59     | $\beta$ -Gurjunene        | 41.63    | 1474 | 3.35      | 1.62    |
| 23     | (Z)- $\beta$ -Ocimene  | 25.98    | 1059 | 791.18    | 378.52  | 60     | Aromadendrene             | 41.79    | 1479 | 38.12     | 5.43    |
| 24     | (E)- $\beta$ -Ocimene  | 26.41    | 1068 | 8.77      | 7.05    | 61     | (E)- $\beta$ -Ionone      | 42.01    | 1485 | 16.61     | 4.94    |
| 25     | $\gamma$ -Terpinene    | 26.74    | 1076 | 21.12     | 508.15  | 62     | $\alpha$ -Humulene        | 42.39    | 1498 | 65.93     | 40.19   |
| 26     | Isolimonene            | 26.98    | 1082 | 5.49      | 6.04    | 63     | $\alpha$ -Farnesene       | 42.63    | 1505 | 12.12     | 2.15    |
| 27     | p-Mentha-3,8-diene     | 27.43    | 1093 | 11.22     | 14.01   | 64     | Germacrene D              | 43.13    | 1522 | 19.82     | 0.70    |
| 28     | Terpinolene            | 27.96    | 1105 | 77.01     | 149.81  | 65     | $\gamma$ -Muuroleone      | 43.28    | 1526 | 0.00      | 0.96    |
| 29     | Perillene              | 28.04    | 1107 | 0.00      | 8.61    | 66     | $\alpha$ -Muuroleone      | 43.40    | 1530 | 41.76     | 5.42    |
| 30     | Linalool               | 28.28    | 1113 | 570.12    | 133.46  | 67     | $\beta$ -Selinene         | 43.47    | 1533 | 0.00      | 12.91   |
| 31     | Nonanal                | 28.42    | 1116 | 0.00      | 0.00    | 68     | $\alpha$ -Selinene        | 43.60    | 1537 | 57.51     | 14.09   |
| 32     | 1,3,8-p-Menthatriene   | 29.21    | 1135 | 4.36      | 3.70    | 69     | $\delta$ -Cadinene        | 43.99    | 1550 | 17.25     | 9.26    |
| 33     | (E,E)-allo-Ocimene     | 29.38    | 1139 | 101.10    | 28.07   | 70     | (Z)-Calamenene            | 44.26    | 1559 | 1.66      | 1.90    |
| 34     | (Z)-Limonene oxide     | 29.65    | 1146 | 15.73     | 11.70   | 71     | (E)-Cadin-1,4-diene       | 44.58    | 1570 | 1.70      | 0.84    |
| 35     | Camphor                | 29.97    | 1154 | 75.26     | 48.51   | 72     | (E)-Nerolidol             | 44.89    | 1580 | 2.35      | 0.00    |
| 36     | Terpinen-4-ol          | 32.06    | 1206 | 5.32      | 12.33   | 73     | $\gamma$ -Eudesmol        | 45.64    | 1606 | 1.03      | 0.00    |
| 37     | $\alpha$ -Terpineol    | 32.57    | 1219 | 5.99      | 7.18    |        | Total                     |          |      | 11866.42  | 5680.13 |

RT and RI represent retention time and retention index, respectively. Note some VOCs concentrations in infected tissue are amplified, some are suppressed, while others are unaffected (red text indicates amplified/suppressed examples).

**Table S4. Estimated canine detection of CLAs infections considering sampling speed, reward time, duty cycle and the effect of disease Incidence (DI).**

| Total trees per 4.05 ha (10 ac) block | Interrogation time/tree (s) | Reward time/detection (s) | CLas Incidence (DI) | Total CLas-positive trees rounded up | Total Reward Time (s) | Total Reward Time (min) | Total Survey incl. reward time (min) |
|---------------------------------------|-----------------------------|---------------------------|---------------------|--------------------------------------|-----------------------|-------------------------|--------------------------------------|
| 1470                                  | 2.26 ± 0.91                 | 47.45 ± 16.37             | 0.005               | 7                                    | 332.2                 | 5.54                    | 60.91                                |
|                                       |                             |                           | 0.01                | 15                                   | 711.8                 | 11.86                   | 67.23                                |
|                                       |                             |                           | 0.02                | 29                                   | 1376.1                | 22.93                   | 78.30                                |
|                                       |                             |                           | 0.05                | 74                                   | 3511.3                | 58.52                   | 113.89                               |

870 **Table S5. Results of simulation of canine detection accuracy for perimeter and stratified survey designs.**

| Canine Accuracy | Perimeter |       |       |       |       |       |       | Canine Accuracy | Stratified (Skip Rows) |       |       |       |       |
|-----------------|-----------|-------|-------|-------|-------|-------|-------|-----------------|------------------------|-------|-------|-------|-------|
|                 | 1         | 2     | 3     | 4     | 5     | 6     | 7     |                 | 7                      | 4     | 3     | 2     | 1     |
| 1               | 0.772     | 0.876 | 0.920 | 0.949 | 0.973 | 0.978 | 1.000 | 1               | 0.790                  | 0.845 | 0.874 | 0.911 | 1.000 |
| 0.95            | 0.767     | 0.870 | 0.915 | 0.944 | 0.968 | 0.973 | 0.995 | 0.95            | 0.784                  | 0.839 | 0.868 | 0.907 | 0.995 |
| 0.9             | 0.761     | 0.864 | 0.910 | 0.938 | 0.963 | 0.969 | 0.990 | 0.9             | 0.778                  | 0.833 | 0.861 | 0.901 | 0.990 |
| 0.85            | 0.756     | 0.858 | 0.904 | 0.932 | 0.957 | 0.963 | 0.984 | 0.85            | 0.771                  | 0.826 | 0.854 | 0.896 | 0.984 |
| 0.8             | 0.749     | 0.851 | 0.898 | 0.926 | 0.950 | 0.958 | 0.978 | 0.8             | 0.764                  | 0.819 | 0.847 | 0.889 | 0.978 |
| 0.75            | 0.742     | 0.843 | 0.891 | 0.919 | 0.943 | 0.951 | 0.972 | 0.75            | 0.756                  | 0.811 | 0.839 | 0.882 | 0.972 |
| 0.7             | 0.734     | 0.836 | 0.884 | 0.912 | 0.935 | 0.945 | 0.964 | 0.7             | 0.748                  | 0.802 | 0.831 | 0.875 | 0.964 |
| 0.65            | 0.725     | 0.827 | 0.876 | 0.904 | 0.927 | 0.937 | 0.956 | 0.65            | 0.739                  | 0.793 | 0.822 | 0.866 | 0.956 |
| 0.6             | 0.715     | 0.818 | 0.867 | 0.895 | 0.918 | 0.928 | 0.947 | 0.6             | 0.729                  | 0.783 | 0.812 | 0.857 | 0.947 |
| 0.55            | 0.704     | 0.807 | 0.857 | 0.885 | 0.907 | 0.919 | 0.937 | 0.55            | 0.718                  | 0.772 | 0.801 | 0.846 | 0.937 |
| 0.5             | 0.692     | 0.796 | 0.846 | 0.874 | 0.896 | 0.908 | 0.926 | 0.5             | 0.706                  | 0.759 | 0.789 | 0.835 | 0.926 |
| 0.45            | 0.678     | 0.783 | 0.834 | 0.861 | 0.883 | 0.895 | 0.913 | 0.45            | 0.693                  | 0.745 | 0.775 | 0.822 | 0.913 |
| 0.4             | 0.662     | 0.769 | 0.820 | 0.847 | 0.868 | 0.881 | 0.898 | 0.4             | 0.677                  | 0.730 | 0.760 | 0.807 | 0.898 |
| 0.35            | 0.643     | 0.753 | 0.804 | 0.831 | 0.851 | 0.865 | 0.882 | 0.35            | 0.659                  | 0.711 | 0.743 | 0.790 | 0.882 |
| 0.3             | 0.621     | 0.733 | 0.785 | 0.812 | 0.832 | 0.846 | 0.862 | 0.3             | 0.638                  | 0.689 | 0.722 | 0.770 | 0.862 |
| 0.25            | 0.595     | 0.709 | 0.762 | 0.789 | 0.809 | 0.823 | 0.838 | 0.25            | 0.613                  | 0.663 | 0.697 | 0.746 | 0.838 |
| 0.2             | 0.562     | 0.680 | 0.733 | 0.762 | 0.780 | 0.795 | 0.809 | 0.2             | 0.581                  | 0.630 | 0.665 | 0.715 | 0.809 |
| 0.15            | 0.519     | 0.639 | 0.694 | 0.725 | 0.743 | 0.759 | 0.771 | 0.15            | 0.538                  | 0.585 | 0.623 | 0.674 | 0.771 |
| 0.1             | 0.458     | 0.579 | 0.636 | 0.669 | 0.689 | 0.706 | 0.717 | 0.1             | 0.476                  | 0.521 | 0.561 | 0.612 | 0.717 |
| 0.05            | 0.353     | 0.471 | 0.530 | 0.566 | 0.589 | 0.607 | 0.618 | 0.05            | 0.371                  | 0.411 | 0.451 | 0.502 | 0.618 |
| Sample %        | 16        | 31    | 46    | 60    | 74    | 87    | 100   | Sample %        | 22                     | 29    | 36    | 50    | 100   |

875 For the simulation estimates, detection uncertainty = sampling uncertainty + canine detection accuracy. Highlighted are two groups of scenarios for 95% (red outline) and 75% (purple box) detection accuracy for canine perimeter surveys of 1 to 7 tree(s) depth and for stratified surveys of every 7<sup>th</sup>, 4<sup>th</sup>, 3<sup>rd</sup>, 2<sup>nd</sup> or single rows, respectively. Perimeter survey 7 trees deep and stratified survey of every (1) row, constitutes a complete census of all trees.

## Movie Legends

880 **Movie S1.**

Canine ‘Bello’, a springer spaniel, interrogating citrus trees arranged in a 10 X 10 grid. Canine alerts by sitting next to the CLAs-positive tree, i.e. target. This activity is repeated by re-randomizing locations of CLAs-positive trees within the grid for both training and to test each canine for detection accuracy.

885

**Movie S2.**

Canine ‘Zsemir’, a Belgian malinois, interrogating metal cans containing non-infected and CLAs-infected root samples. Canine alerts by sitting next to the can containing CLAs-positive roots, i.e. target.

890

**Movie S3.**

Canine ‘Mira’, a German Shepard/Belgian malinois mix, interrogating citrus trees arranged in rows. Trees from the USDA, ARS Exotic Citrus Pathogen Collection in Beltsville, Maryland, USA placed on the lawn outside the facility. Canine alerts by sitting next to the CLAs-positive tree, i.e. target but does not react to other citrus pathogens, incl. viruses, viroids, spiroplasma, and other bacteria. The canine continues the run of the remaining trees, incl. past two trees infected with *Sprionoplasma citri* (causal agent of citrus stubborn) eventually coming to and alerting on a CLAs-positive tree, i.e. infected with *Candidatus Liberibacter africanus*, the African form of HLB.

895

900 **Movie S4.**

Canine ‘Mira’, a German Shepard/Belgian malinois mix, interrogating metal cans arranged in rows and each containing a small cage holding either non-infected or CLAs-infected Asian citrus psyllid vectors. Canine alerts by sitting next to the can containing an insect cage with CLAs-positive psyllids.

905

**Movie S5.**

Canine ‘Maci’, a Belgian malinois, interrogating red grapefruit trees in a commercial orchard in the Rio Grande Valley of Texas, USA. Canine runs along the row of trees and abruptly stops and sits ‘alerts’ when he acquires the scent profile of a CLAs-positive tree. Note canine is wearing red rubber shoes to protect it from thorny weeds.

910

**Movie S6.**

Canine ‘Szaboles’, a Belgian malinois, interrogating citrus trees in a residential property in Los Angeles County, California, USA. Canine walks along the various plants located on the property. Here the canine interrogates a sable palm cycad in a pot, a potted lemon tree, and a CLAs-positive orange tree. Canine stops and sits ‘alerts’ when he acquires the scent profile from the CLAs-positive orange tree.

915

**Movie S7.**

920 Simulation of CLAs epidemic over a 10-year period based on an SECIR model (see text). Simulation considers three disease control strategies of HLB i) canine, ii) PCR and iii) visual survey to detect CLAs-infections. Commercial orchard size is 16.2 ha (40 ac) with < 1% initial infection occurring initially on the southern border and simulated survey is conducted on 180 day

925 intervals followed by removal of infected trees within 30 da post infection. Infected (I) class  
individuals are infectious and symptomatic whereas Cryptic (C) class individuals are infectious  
but asymptomatic. Comparisons of the three control strategies demonstrate improved orchard  
health and cost benefit of canine early detection. Corresponds to Fig. S21.

**Movie S8.**

930 Simulation of CLas epidemic over a 10-year period based on an SECIR model (see text).  
Simulation considers three disease control strategies of HLB i) canine, ii) PCR and iii) visual  
survey to detect CLas-infections. Commercial orchard size is 16.2 ha (40 ac) with < 1% initial  
infection occurring initially on the southern border and simulated survey is conducted on 180 day  
intervals followed by removal of infected trees within 30 da post infection. In this simulation  
935 cumulative tree removals over the prior year are replanted once per year in the first quarter.  
Infected (I) class individuals are infectious and symptomatic whereas Cryptic (C) class individuals  
are infectious but asymptomatic. Comparisons of the three control strategies demonstrate  
improved orchard health and cost benefit of canine early detection. Corresponds to Fig. S22.
